# Supplementary material for: Ventral striatum dopamine release encodes unique properties of visual stimuli in mice
Source: eLife. 2023 Apr 17;12:e85064. doi: 10.7554/eLife.85064 (PMC10162799; doi:10.7554/eLife.85064)
Supplement: Figure 1—source data 1. [file elife-85064-fig1-data1.xlsx]

## Sheet: 1C-D Looming Stimuli
Contrast Inverted Static Disc								Effect	3-Way Repeated Measures Analysis of Variance Sigma-restricted parameterization Effective hypothesis decomposition									Two-way RM ANOVA - Peak Latency	Matching: Both factors
Peak 1	Peak 2	Peak 3	Peak 4	Peak 5	Average Latency				SS	Degr. of	MS	F	p					Assume sphericity?	No
14.8527	7.59147	6.33844	7.42184	8.24577	0.539732			Intercept	4920.11	1	4920.11	314.598	0					Alpha	0.05
13.2575	5.88007	6.09636	4.82636	3.62965	0.455101			Background	2250.74	1	2250.74	143.915	0
14.2489	7.40428	5.80657	7.24732	5.72956	0.470846			Disc Type	300.655	2	150.327	9.61213	0.000239217					Source of Variation	% of total variation	P value	P value summary	Significant?	Geisser-Greenhouse's epsilon
14.5224	6.64264	7.14204	6.92323	6.06343	0.490528			Background*Disc Type	306.161	2	153.08	9.78815	0.000209423					Stimulus Contrast (Black vs Inverted)	22.18	0.0005	***	Yes	1
8.92446	5.99496	4.90674	5.45213	2.32294	0.468878			Error	938.361	60	15.6393							Stimulus Type (Loom vs Inverted vs Static)	14.94	0.0141	*	Yes	0.6037
9.62575	4.35329	3.96923	5.68556	2.50993	0.451164			Stimulus Number	770.548	4	192.637	153.266	0					Stimulus Contrast (Black vs Inverted) x Stimulus Type (Loom vs Inverted vs Static)	22.44	<0.0001	****	Yes	0.8728
11.1946	6.18744	5.4729	5.10258	5.61192	0.439355			Stimulus Number*Background	266.115	4	66.5288	52.9319	0					Subject x Stimulus Contrast (Black vs Inverted)	8.634
24.6346	10.4359	12.9495	11.4913	14.9426	0.457069			Stimulus Number*Disc Type	28.4934	8	3.56167	2.83375	0.00504706					Subject x Stimulus Type (Loom vs Inverted vs Static)	19.71
4.7716	1.55667	2.09565	1.6219	2.35338	0.547604			Stimulus Number*Background*Disc Type	20.29	8	2.53625	2.0179	0.0450755					Subject	8.632
9.55708	4.60667	6.04815	5.19221	4.5557	0.486591			Error	301.651	240	1.25688
12.3136	6.45844	4.91236	5.86243	6.08512	0.567286													ANOVA table	SS	DF	MS	F (DFn, DFd)	P value
																		Stimulus Contrast (Black vs Inverted)	0.3734	1	0.3734	F (1.000, 10.00) = 25.69	P=0.0005
								Individual Differences										Stimulus Type (Loom vs Inverted vs Static)	0.2516	2	0.1258	F (1.207, 12.07) = 7.582	P=0.0141
								Bonferroni test Probabilities for Post Hoc Tests_x000D_ Error: Between; Within; Pooled MS = 4.1334, df = 102.14										Stimulus Contrast (Black vs Inverted) x Stimulus Type (Loom vs Inverted vs Static)	0.3777	2	0.1889	F (1.746, 17.46) = 64.78	P<0.0001
Contrast Inverted Looming Disc								Peak comparison p value	1	2	3	4	5					Subject x Stimulus Contrast (Black vs Inverted)	0.1454	10	0.01454
Peak 1	Peak 2	Peak 3	Peak 4	Peak 5	Average Latency			Inverted-Static vs Inverted-Looming	0.445251	0.12784	0.103773	0.0132244	0.00997699					Subject x Stimulus Type (Loom vs Inverted vs Static)	0.3318	20	0.01659
10.9934	1.79549	2.52314	1.001	1.04887	0.600745			Inverted-Static vs Inverted-Receding	1	1	1	1	1					Subject	0.1453	10	0.01453
6.93678	3.02528	2.27252	3.20326	3.1603	0.791656			Inverted-Static vs Black-Static	0	1.73257e-05	1.19985e-05	3.73398e-06	5.34638e-05					Residual	0.05831	20	0.002915
7.06997	2.59939	1.70919	1.48873	1.4651	0.890064			Inverted-Static vs Black-Looming	0	2.66724e-05	1.92491e-05	5.26895e-06	0.000241949
17.9405	4.4816	4.53593	3.44062	1.8549	0.577127			Inverted-Static vs Black-Receding	0	0.000108524	6.27506e-05	4.22615e-05	0.00036038					Difference between row means
3.20079	1.56483	2.14341	1.75814	1.62965	0.500368			Inverted-Looming vs Inverted-Receding	1	3.77291e-05	3.6129e-05	5.37498e-05	9.39119e-06					Mean of Black	0.6989
9.10446	3.05885	2.73183	1.61404	2.39046	0.571222			Inverted-Looming vs Black-Static	8.54816e-12	1	1	1	1					Mean of Inverted	0.5485
8.16763	2.01335	2.4123	2.81138	1.4047	0.545636			Inverted-Looming vs Black-Looming	6.58851e-09	1	1	1	1					Difference between means	0.1504
14.8008	5.36637	3.37718	2.68675	1.63733	0.523986			Inverted-Looming vs Black-Receding	7.08435e-10	1	1	1	1					SE of difference	0.02968
9.25145	2.4768	2.74217	2.21803	1.2833	0.911714			Inverted-Receding vs Black-Static	0	1.09697e-09	9.38511e-10	6.57349e-09	2.49727e-08					95% CI of difference	0.08431 to 0.2166
5.93239	2.01376	1.65865	2.27225	1.07859	1.10066			Inverted-Receding vs Black-Looming	4.82947e-14	1.76532e-09	1.57658e-09	9.48677e-09	1.33087e-07
12.2618	2.95984	3.31025	2.69982	2.77003	0.569254			Inverted-Receding vs Black-Receding	0	8.43182e-09	5.83294e-09	8.89019e-08	2.07932e-07					Data summary
								Black-Static vs Black-Looming	1	1	1	1	1					Number of columns (Stimulus Type (Loom vs Inverted vs Static))	3
								Black-Static vs Black-Receding	1	1	1	1	1					Number of rows (Stimulus Contrast (Black vs Inverted))	2
								Black-Looming vs Black-Receding	1	1	1	1	1					Number of subjects (Subject)	11
Contrast Inverted Receding Disc																		Number of missing values	0
Peak 1	Peak 2	Peak 3	Peak 4	Peak 5	Average Latency
12.2639	9.10668	7.65126	8.64127	7.74882	0.468806
11.0857	6.33428	6.65123	6.80031	4.96054	0.476679			Effect	Repeated Measures Analysis of Variance with Effect Sizes and Powers Sigma-restricted parameterization Effective hypothesis decomposition
14.3695	7.96112	8.9665	6.20791	8.088	0.494392				SS	Degr. of	MS	F	p	Partial eta-squared	Non-centrality	Observed power (alpha=0.05)		Bonferroni's multiple comparisons test	Mean Diff.	95.00% CI of diff.	Below threshold?	Summary	Adjusted P Value
15.7375	10.2315	11.9489	10.9302	9.0369	0.458965			Intercept	4920.11	1	4920.11	314.598	0	0.839828	314.598	1		Black:Loom vs. Black:Receding	-0.1393	-0.2605 to -0.01817	Yes	*	0.02
9.62849	5.81508	7.22519	6.39604	8.0588	0.425507			Background	2250.74	1	2250.74	143.915	0	0.70576	143.915	1		Black:Loom vs. Black:Static	0.09248	-0.07374 to 0.2587	No	ns	0.8863
8.56901	5.16732	6.25119	5.66864	5.72638	0.439284			Disc Type	300.655	2	150.327	9.61213	0.000239217	0.242656	19.2243	0.976273		Black:Loom vs. Inverted:Loom	-0.006018	-0.1667 to 0.1546	No	ns	>0.9999
10.3521	4.80208	5.22562	3.33486	2.86178	0.433379			Background*Disc Type	306.161	2	153.08	9.78815	0.000209423	0.246007	19.5763	0.978328		Black:Loom vs. Inverted:Receding	0.2157	0.1188 to 0.3127	Yes	***	0.0001
16.7046	14.709	12.0453	12.8097	11.5522	0.437316			Error	938.361	60	15.6393							Black:Loom vs. Inverted:Static	0.1947	0.08380 to 0.3057	Yes	***	0.0008
9.23087	6.1828	4.46938	4.53362	4.03755	0.449125			R1	770.548	4	192.637	153.266	0	0.718662	613.066	1		Black:Receding vs. Black:Static	0.2318	0.1064 to 0.3572	Yes	***	0.0005
8.33872	6.21175	5.33162	4.53102	6.10857	0.543596			R1*Background	266.115	4	66.5288	52.9319	0	0.468706	211.727	1		Black:Receding vs. Inverted:Loom	0.1333	-0.1326 to 0.3993	No	ns	>0.9999
12.8497	9.82341	8.73227	9.57291	9.46405	0.516042			R1*Disc Type	28.4934	8	3.56167	2.83375	0.00504706	0.0863059	22.67	0.941641		Black:Receding vs. Inverted:Receding	0.3551	0.2175 to 0.4927	Yes	****	<0.0001
								R1*Background*Disc Type	20.29	8	2.53625	2.0179	0.0450755	0.0630241	16.1432	0.818809		Black:Receding vs. Inverted:Static	0.3341	0.1950 to 0.4732	Yes	****	<0.0001
								Error	301.651	240	1.25688							Black:Static vs. Inverted:Loom	-0.09849	-0.3998 to 0.2028	No	ns	>0.9999
																		Black:Static vs. Inverted:Receding	0.1233	-4.887e-006 to 0.2465	No	ns	0.05
Dark Looming Disc																		Black:Static vs. Inverted:Static	0.1023	0.004823 to 0.1997	Yes	*	0.0368
Peak 1	Peak 2	Peak 3	Peak 4	Peak 5	Average Latency													Inverted:Loom vs. Inverted:Receding	0.2218	0.01647 to 0.4270	Yes	*	0.0304
2.86363	0.580377	0.984495	0.396504	1.51871	0.685261													Inverted:Loom vs. Inverted:Static	0.2008	-0.02940 to 0.4309	No	ns	0.1126
5.75743	1.6502	1.38087	1.29534	1.54747	0.807251													Inverted:Receding vs. Inverted:Static	-0.02101	-0.07289 to 0.03088	No	ns	>0.9999
5.47669	1.63298	0.86083	1.33733	0.934128	0.657715
4.18583	0.647158	1.31857	0.72909	0.298188	0.614428
0.763635	0.722086	0.415415	0.863171	2.16568	0.61246
2.71938	2.3674	1.19393	1.14665	0.688491	0.702969
2.06003	0.0945344	0.158103	0.354154	1.07961	0.579011
4.52765	1.26233	1.05075	0.70159	1.27722	0.628201
0.944232	0.113952	0.683556	-0.0584598	0.421178	0.809219
1.54451	1.3107	0.610133	0.620784	0.652136	0.821024
2.39209	1.00341	0.665131	0.32097	0.51111	0.598687
Black Receding Disc
Peak 1	Peak 2	Peak 3	Peak 4	Peak 5	Average Latency
2.72912	1.88577	1.83277	2.43227	0.561937	0.734451
1.85115	1.17865	1.95326	1.96814	1.2255	1.04336
4.76054	1.40891	1.42647	2.12834	2.04028	0.71871
2.89282	0.959222	0.371919	0.348267	1.24288	0.799381
0.763123	1.66356	0.427766	0.968848	0.5986	0.909566
2.60499	1.02227	1.23829	1.17455	1.18182	0.88989
2.1574	0.875994	0.926403	0.195916	0.698169	0.714775
3.87022	1.0911	0.387888	0.359206	1.3624	0.852506
2.20615	1.07094	0.796236	1.13431	0.60202	0.870214
1.56753	2.08094	0.828765	0.526626	0.946347	0.752159
3.55053	1.16003	1.64847	0.843092	1.51915	0.763964
Black Static Disc
Peak 1	Peak 2	Peak 3	Peak 4	Peak 5	Average Latency
1.02859	1.22864	0.867854	-0.174389	0.543385	0.649844
0.72753	0.56536	0.497837	0.0804105	1.18444	0.594752
2.35768	2.44187	1.38756	1.87387	0.827183	0.535724
2.63365	0.860197	0.540911	0.434713	0.768985	0.640007
1.89782	0.609776	0.0375649	0.580871	0.565579	0.732483
2.63121	0.900085	1.29473	0.421369	0.80635	0.577044
2.15204	1.18463	0.855257	0.964543	0.31464	0.594752
2.70382	0.885039	0.318405	0.828763	0.442482	0.5554
0.705056	0.328612	0.585757	0.166742	0.998857	0.606558
0.852468	0.955765	1.24979	1.6365	0.550821	0.417669
2.90963	0.514017	0.693501	0.183819	0.803415	0.594752

## Sheet: 1E Looming Behavior
Escape Velocity (cm/s)									1-Way Repeated measures ANOVA summary
Black Looming Disc	Color Inverted Looming Disc	Black Receding Disc	Color Inverted Receding Disc	Black Static Disc	Color Inverted Static Disc				Assume sphericity?	No
54.4017	15.6489	17.7394	18.0289	12.8041	22.0548				F	32.49
82.6262	13.4264	1.70688	24.7447	30.0482	9.2329				P value	<0.0001
7.18566	10.1194	14.3967	11.8364	1.65862	44.229				P value summary	****
97.3226	10.7467	54.8386	28.7147	14.2519	25.2781				Statistically significant (P < 0.05)?	Yes
101.587	17.5971	35.4736	24.323	61.3867	24.4145				Geisser-Greenhouse's epsilon	0.44
111.971	20.541	25.1612	43.1089	5.9563	15.047				R squared	0.747
60.9702	17.6276	2.52984	6.26364	11.9685	20.9677
80.7999	21.4325	20.2362	24.3205	5.6134	25.3619				Was the matching effective?
72.1919	13.0277	8.65886	4.8768	9.84504	18.1635				F	2.088
78.2498	13.5382	11.8186	32.6593	11.7323	16.3982				P value	0.0367
68.9204	12.2504	1.99238	17.8029	16.0528	8.16102				P value summary	*
99.6036	5.45084	5.81406	12.5451	8.6614	7.73684				Is there significant matching (P < 0.05)?	Yes
									R squared	0.09555
									ANOVA table	SS	DF	MS	F (DFn, DFd)	P value
									Treatment (between columns)	34990	5	6998	F (2.200, 24.20) = 32.49	P<0.0001
									Individual (between rows)	4948	11	449.8	F (11, 55) = 2.088	P=0.0367
									Residual (random)	11848	55	215.4
									Total	51786	71
									Data summary
									Number of treatments (columns)	6
									Number of subjects (rows)	12
									Number of missing values	0
									Bonferroni's multiple comparisons test	Mean Diff.	95.00% CI of diff.	Below threshold?	Summary	Adjusted P Value
									Looming Disc vs. Receding Disc	59.62	30.95 to 88.29	Yes	***	0.0001	A-B
									Looming Disc vs. Static Disc	60.49	31.81 to 89.16	Yes	***	0.0001	A-C
									Looming Disc vs. Inverted Loooming Disc	62.04	32.66 to 91.41	Yes	***	0.0001	A-D
									Looming Disc vs. Inverted Receding Disc	55.55	30.27 to 80.83	Yes	****	<0.0001	A-E
									Looming Disc vs. Inverted Static Disc	56.57	18.86 to 94.27	Yes	**	0.0024	A-F
									Receding Disc vs. Static Disc	0.8656	-20.11 to 21.84	No	ns	>0.9999	B-C
									Receding Disc vs. Inverted Loooming Disc	2.413	-14.55 to 19.37	No	ns	>0.9999	B-D
									Receding Disc vs. Inverted Receding Disc	-4.072	-19.44 to 11.29	No	ns	>0.9999	B-E
									Receding Disc vs. Inverted Static Disc	-3.057	-19.19 to 13.07	No	ns	>0.9999	B-F
									Static Disc vs. Inverted Loooming Disc	1.548	-15.59 to 18.69	No	ns	>0.9999	C-D
									Static Disc vs. Inverted Receding Disc	-4.937	-24.66 to 14.78	No	ns	>0.9999	C-E
									Static Disc vs. Inverted Static Disc	-3.922	-25.31 to 17.46	No	ns	>0.9999	C-F
									Inverted Loooming Disc vs. Inverted Receding Disc	-6.485	-17.54 to 4.568	No	ns	0.768	D-E
									Inverted Loooming Disc vs. Inverted Static Disc	-5.47	-16.87 to 5.929	No	ns	>0.9999	D-F
									Inverted Receding Disc vs. Inverted Static Disc	1.015	-16.36 to 18.39	No	ns	>0.9999	E-F
