# Supplementary material for: Ventral striatum dopamine release encodes unique properties of visual stimuli in mice
Source: eLife. 2023 Apr 17;12:e85064. doi: 10.7554/eLife.85064 (PMC10162799; doi:10.7554/eLife.85064)
Supplement: Figure 2—figure supplement 1—source data 1. [file elife-85064-fig2-figsupp1-data1.xlsx]

## Sheet: Figure 2 Supplement - Fades
Data from Averaged Traces			Data from Individual Peaks				Peak - Individual Mice										Peak Latency - Individual Mice
Transition Time	Z-score	Transition Time (s)	Z-score	Transition Time (s)			Repeated measures ANOVA summary										Repeated measures ANOVA summary
0	10.2166	0.432645	10.3852	0.434755			Assume sphericity?	No									Assume sphericity?	No
0.05	7.23227	0.442478	7.38274	0.443693			F	17.76									F	11.03
0.1	6.69665	0.452311	6.8643	0.45263			P value	<0.0001									P value	0.0071
0.2	5.16552	0.471976	5.3754	0.474974			P value summary	****									P value summary	**
0.3	4.94495	0.491642	5.20716	0.499106			Statistically significant (P < 0.05)?	Yes									Statistically significant (P < 0.05)?	Yes
0.4	4.1275	0.501475	4.47244	0.510725			Geisser-Greenhouse's epsilon	0.4926									Geisser-Greenhouse's epsilon	0.1479
0.5	5.02878	0.540806	5.19202	0.542901			R squared	0.6398									R squared	0.5244
1	2.47387	0.560472	3.0376	0.588556
2	0.847174	0.580138	1.52586	0.926328			Was the matching effective?										Was the matching effective?
							F	13.14									F	1.105
							P value	<0.0001									P value	0.3708
							P value summary	****									P value summary	ns
							Is there significant matching (P < 0.05)?	Yes									Is there significant matching (P < 0.05)?	No
							R squared	0.4034									R squared	0.06984
							ANOVA table	SS	DF	MS	F (DFn, DFd)	P value					ANOVA table	SS	DF	MS	F (DFn, DFd)	P value
							Treatment (between columns)	280.1	7	40.01	F (3.448, 34.48) = 17.76	P<0.0001					Treatment (between columns)	1.909	7	0.2727	F (1.036, 10.36) = 11.03	P=0.0071
							Individual (between rows)	296	10	29.6	F (10, 70) = 13.14	P<0.0001					Individual (between rows)	0.2733	10	0.02733	F (10, 70) = 1.105	P=0.3708
							Residual (random)	157.7	70	2.252							Residual (random)	1.731	70	0.02473
							Total	733.7	87								Total	3.913	87
							Data summary										Data summary
							Number of treatments (columns)	8									Number of treatments (columns)	8
							Number of subjects (rows)	11									Number of subjects (rows)	11
							Number of missing values	0									Number of missing values	0
							Bonferroni's multiple comparisons test	Mean Diff.	95.00% CI of diff.	Below threshold?	Summary	Adjusted P Value	A-?				Bonferroni's multiple comparisons test	Mean Diff.	95.00% CI of diff.	Below threshold?	Summary	Adjusted P Value	A-?
							0.05 vs. 0.1	0.5184	-1.560 to 2.597	No	ns	>0.9999	B	0.1			0.05 vs. 0.1	-0.008938	-0.01724 to -0.0006386	Yes	*	0.0324	B	0.1
							0.05 vs. 0.2	2.007	-0.7035 to 4.718	No	ns	0.2224	C	0.2			0.05 vs. 0.2	-0.03128	-0.05686 to -0.005703	Yes	*	0.0146	C	0.2
							0.05 vs. 0.3	2.176	-0.1780 to 4.529	No	ns	0.077	D	0.3			0.05 vs. 0.3	-0.05541	-0.07786 to -0.03297	Yes	****	<0.0001	D	0.3
							0.05 vs. 0.4	2.91	0.5573 to 5.263	Yes	*	0.0135	E	0.4			0.05 vs. 0.4	-0.06703	-0.09016 to -0.04391	Yes	****	<0.0001	E	0.4
							0.05 vs. 0.5	2.191	-0.05222 to 4.434	No	ns	0.0571	F	0.5			0.05 vs. 0.5	-0.09921	-0.1213 to -0.07713	Yes	****	<0.0001	F	0.5
							0.05 vs. 1	4.345	2.043 to 6.648	Yes	***	0.0006	G	1			0.05 vs. 1	-0.1449	-0.2073 to -0.08246	Yes	***	0.0001	G	1
							0.05 vs. 2	5.857	3.219 to 8.495	Yes	***	0.0001	H	2			0.05 vs. 2	-0.4826	-0.9343 to -0.03100	Yes	*	0.034	H	2

## Sheet: Figure 2 Supplement - Tones
dLight1 Peak Response to 80 dB Tones								Tones Only: Repeated measures ANOVA summary								Tones vs Light: Mixed-effects model (REML)								Tone Response - Correlation with 5 uW/mm2 White LED Response
1	2	6	8	12	16			Assume sphericity?	No							Mixed-effects model (REML)	Matching: Across row							Light	0 kHz	1 kHz	2 kHz	4 kHz	6 kHz	8 kHz	12 kHz	16 kHz		Linear Regression: Light vs Tone
1.18269	3.30949	4.66428	3.30073	3.66606	1.07377			F	10.11							Assume sphericity?	No							5.39839	0.268258	0.365874	4.17693	7.42453	2.99631	4.07931	3.27797	2.79855			0 kHz	1 kHz	2 kHz	4 kHz	6 kHz	8 kHz	12 kHz	16 kHz
0.365874	4.17693	2.99631	4.07931	3.27797	2.79855			P value	0.0001							Alpha	0.05							13.1074	0.408418	1.31753	1.90351	0.792024	4.0817	4.5392	3.49501	1.79807		Best-fit values
1.31753	1.90351	4.0817	4.5392	3.49501	1.79807			P value summary	***															7.8536	0.446822	0.314073	0.146249	0.657794	1.11002	1.77306	1.03448	0.178764		Slope	0.01721	0.1203	-0.311	-0.6079	0.2192	0.05771	0.02851	-0.1762
3.58378	2.77022	4.05986	3.75537	5.85475	1.94033			Statistically significant (P < 0.05)?	Yes							Fixed effect (type III)	P value	P value summary	Statistically significant (P < 0.05)?	F (DFn, DFd)	Geisser-Greenhouse's epsilon			9.71396	0.407404	-0.451127	0.44224	6.66593	1.29302	1.58731	0.635169	0.343035		Y-intercept	0.303	-0.7772	4.548	9.107	1.135	3.532	2.823	2.991
0.314073	0.146249	1.11002	1.77306	1.03448	0.178764			Geisser-Greenhouse's epsilon	0.5999							Treatment (between columns)	<0.0001	****	Yes	F (2.357, 19.64) = 26.62	0.3929			7.95509	0.516789	-0.185757	3.6737	3.55833	3.25752	6.2772	5.05426	3.36493		X-intercept	-17.61	6.458	14.63	14.98	-5.176	-61.21	-99.04	16.97
-0.451127	0.44224	1.29302	1.58731	0.635169	0.343035			R squared	0.5289															9.75061	0.695703	0.448283	0.222438	2.85359	5.85817	6.04039	4.97419	-0.0166304		1/slope	58.11	8.31	-3.216	-1.645	4.562	17.33	35.08	-5.675
3.74053	4.09668	4.79176	5.43487	2.40455	3.89582											Random effects	SD	Variance
-0.185757	3.6737	3.25752	6.2772	5.05426	3.36493			Was the matching effective?								Individual (between rows)	0.9718	0.9445																Std. Error
0.448283	0.222438	5.85817	6.04039	4.97419	-0.0166304			F	6.486							Residual	1.376	1.893																Slope	0.02617	0.1018	0.3124	0.4649	0.3268	0.3903	0.3658	0.2678
0.378978	0.587012	2.97856	1.96317	3.3106	0.759665			P value	<0.0001																									Y-intercept	0.2425	0.943	2.896	4.308	3.029	3.617	3.39	2.482
								P value summary	****							Was the matching effective?
								Is there significant matching (P < 0.05)?	Yes							Chi-square, df	10.80, 1																	95% Confidence Intervals
								R squared	0.3793							P value	0.001																	Slope	-0.05544 to 0.08986	-0.1622 to 0.4028	-1.178 to 0.5565	-1.899 to 0.6828	-0.6881 to 1.127	-1.026 to 1.141	-0.9871 to 1.044	-0.9197 to 0.5673
																P value summary	**																	Y-intercept	-0.3703 to 0.9763	-3.395 to 1.841	-3.491 to 12.59	-2.855 to 21.07	-7.274 to 9.544	-6.511 to 13.58	-6.590 to 12.24	-3.900 to 9.881
								ANOVA table	SS	DF	MS	F (DFn, DFd)	P value			Is there significant matching (P < 0.05)?	Yes																	X-intercept	-infinity to 4.331	-infinity to +infinity	-infinity to +infinity	9.724 to +infinity	-infinity to 7.144	-infinity to 6.252	-infinity to 7.139	-infinity to +infinity
								Treatment (between columns)	65.8	5	13.16	F (2.999, 26.99) = 10.11	P=0.0001
								Individual (between rows)	76.01	9	8.446	F (9, 45) = 6.486	P<0.0001			Data summary																		Goodness of Fit
								Residual (random)	58.6	45	1.302					Number of treatments (columns)	7																	R squared	0.09757	0.2591	0.1985	0.2994	0.1011	0.005435	0.001516	0.09769
								Total	200.4	59						Number of subjects (rows)	11																	Sy.x	0.151	0.5873	1.803	2.683	1.886	2.253	2.111	1.546
																Number of missing values	10
								Data summary																										Is slope significantly non-zero?
								Number of treatments (columns)	6																									F	0.4325	1.399	0.9907	1.71	0.4499	0.02186	0.006072	0.4331
								Number of subjects (rows)	10																									DFn, DFd	1, 4	1, 4	1, 4	1, 4	1, 4	1, 4	1, 4	1, 4
								Number of missing values	0																									P value	0.5467	0.3024	0.3759	0.2611	0.5391	0.8896	0.9416	0.5464
																																		Deviation from zero?	Not Significant	Not Significant	Not Significant	Not Significant	Not Significant	Not Significant	Not Significant	Not Significant
								Treatment = Tone Frequency
																																		Equation	Y = 0.01721*X + 0.3030	Y = 0.1203*X - 0.7772	Y = -0.3110*X + 4.548	Y = -0.6079*X + 9.107	Y = 0.2192*X + 1.135	Y = 0.05771*X + 3.532	Y = 0.02851*X + 2.823	Y = -0.1762*X + 2.991
								Bonferroni's multiple comparisons test	Mean Diff.	95.00% CI of diff.	Below threshold?	Summary	Adjusted P Value			Bonferroni's multiple comparisons test	Mean Diff.	95.00% CI of diff.	Below threshold?	Summary	Adjusted P Value
								1 kHz vs. 2 kHz	-1.063	-3.134 to 1.008	No	ns	>0.9999			Light vs. 1	7.663	3.878 to 11.45	Yes	**	0.0022													Data
								1 kHz vs. 6 kHz	-2.44	-4.306 to -0.5732	Yes	**	0.0088			Light vs. 2	6.6	1.003 to 12.20	Yes	*	0.0251													Number of X values	6	6	6	6	6	6	6	6
								1 kHz vs. 8 kHz	-2.806	-5.260 to -0.3511	Yes	*	0.0217			Light vs. 6	5.224	1.224 to 9.223	Yes	*	0.0162													Maximum number of Y replicates	1	1	1	1	1	1	1	1
								1 kHz vs. 12 kHz	-2.301	-4.645 to 0.04221	No	ns	0.0557			Light vs. 8	4.858	0.2129 to 9.502	Yes	*	0.0416													Total number of values	6	6	6	6	6	6	6	6
								1 kHz vs. 16 kHz	-0.5441	-2.387 to 1.298	No	ns	>0.9999			Light vs. 12	5.362	0.6703 to 10.05	Yes	*	0.0287													Number of missing values	0	0	0	0	0	0	0	0
								2 kHz vs. 6 kHz	-1.376	-3.678 to 0.9251	No	ns	0.6341			Light vs. 16	7.119	2.165 to 12.07	Yes	*	0.0106
								2 kHz vs. 8 kHz	-1.742	-3.861 to 0.3767	No	ns	0.1497
								2 kHz vs. 12 kHz	-1.238	-3.641 to 1.166	No	ns	>0.9999
								2 kHz vs. 16 kHz	0.5192	-0.4254 to 1.464	No	ns	0.8667
								6 kHz vs. 8 kHz	-0.3659	-1.876 to 1.144	No	ns	>0.9999
								6 kHz vs. 12 kHz	0.1384	-1.460 to 1.737	No	ns	>0.9999
								6 kHz vs. 16 kHz	1.895	-0.3386 to 4.130	No	ns	0.1269
								8 kHz vs. 12 kHz	0.5044	-1.303 to 2.312	No	ns	>0.9999
								8 kHz vs. 16 kHz	2.261	0.4283 to 4.095	Yes	*	0.0131
								12 kHz vs. 16 kHz	1.757	-0.5856 to 4.100	No	ns	0.2372

## Sheet: Figure 2 Supplement - Peephole
Peak Response to Peephole					Paired t test
	Pre	Post			P value	0.0023
171N	0.690133	4.43896			P value summary	**
151-2L	1.03232	3.08554			Significantly different (P < 0.05)?	Yes
151-2N	-0.0598929	5.13994			One- or two-tailed P value?	Two-tailed
152-2N	0.585739	3.18768			t, df	t=5.721, df=5
210-1N	1.00636	5.6308			Number of pairs	6
245-1N	0.443339	7.40092
					How big is the difference?
					Mean of differences (B - A)	4.198
					SD of differences	1.797
					SEM of differences	0.7337
					95% confidence interval	2.312 to 6.084
					R squared (partial eta squared)	0.8675
					How effective was the pairing?
					Correlation coefficient (r)	-0.3178
					P value (one tailed)	0.2697
					P value summary	ns
					Was the pairing significantly effective?	No

## Sheet: Figure 2 Supplement - White LED
White LED Intensity (uW/cm2)
0.0002											0.0005											0.001											0.002											0.01
Trial 1	2	3	4	5	6	7	8	9	10		Trial 1	2	3	4	5	6	7	8	9	10		Trial 1	2	3	4	5	6	7	8	9	10		Trial 1	2	3	4	5	6	7	8	9	10		Trial 1	2	3	4	5	6
5.83633	1.69089	1.85895	1.98154	3.65269	0.836756	1.60438	2.0366	1.09218	0.494743		1.14328	5.00405	4.39201	5.78396	4.94203	1.93056	2.13253	3.07944	1.46038	6.23103		2.22582	7.25686	2.16067	2.63257	4.80307	2.7385	3.07751	5.83332	1.45254	1.73699		5.48279	6.09554	4.53796	4.27321	3.77888	1.88024	6.00502	4.08452	5.88315	3.78918		6.21846	8.30311	7.38257	5.69287	7.5834	8.6462
5.16629	11.7215	10.734	8.22048	5.34305	6.98878	2.67064	3.25034	9.22969	0.965841		4.58597	10.9698	8.72024	11.4124	6.79521	7.3811	11.3584	11.3342	12.2599	7.20644		9.98711	1.74498	7.58999	14.5657	8.15912	18.5525	16.7733	13.8044	0.208129	6.84532		6.65917	1.33835	11.7094	5.35949	14.3629	3.53959	9.52425	8.15562	13.8747	10.1913		2.02545	5.54015	9.26938	13.454	11.277	13.9033
4.52007	4.98048	6.32264	1.37457	6.91369	4.25441	2.74982	3.4645	0.576367	4.21334		2.19912	2.65033	7.52554	4.84239	7.67523	3.80024	4.66363	2.18544	6.59661	4.44584		1.86293	6.54754	7.71948	5.7928	6.52771	8.06826	1.52986	5.46721	5.83987	5.85972		6.52786	7.10938	5.53133	1.71502	6.13928	5.79857	6.706	7.2364	9.33896	7.70781		3.89989	6.36866	6.93669	11.7267	9.25752	8.50808
3.1336	4.57366	4.52998	4.09689	5.34852	5.93727	2.99225	4.04415	2.59366	3.69806		0.437417	5.68361	5.13653	6.5525	1.87976	5.38009	8.7937	7.37178	8.70661	4.45056		0.807217	6.7383	8.85071	4.24813	10.871	6.13087	9.0155	10.6344	7.66849	4.67216		4.80584	5.83409	5.90293	6.80324	7.51171	8.35082	8.72242	9.18715	11.2136	12.7222		8.93329	9.4026	8.17692	12.0628	11.0112	5.95623
2.49624	11.7898	1.27608	4.29921	3.60393	3.99683	1.88431	1.61772	2.64767	2.50794		0.922519	5.05533	0.980531	6.03996	1.66505	9.63579	3.64138	0.546243	7.57201	1.90564		4.81929	0.991843	6.87033	8.60334	7.37752	5.62346	7.50583	9.77971	1.11455	6.17679		9.40564	8.65349	10.1415	7.83712	11.0681	9.94238	2.9262	8.36086	12.0401	8.44216		8.59045	7.68667	8.21641	7.79222	16.247	8.11443
4.73695	5.45462	6.28398	6.46717	6.47078	7.10493	8.02035	8.80987	12.0209	16.2667		1.33891	2.68745	2.11111	6.21721	10.7928	11.0849	6.25879	5.95458	11.675	8.13845		11.3725	8.56125	12.0745	10.7131	10.6266	11.7568	5.58292	6.29142	6.42476	9.16995		7.23145	15.5146	16.3434	13.6868	12.3908	12.0475	12.6733	6.7815	7.54484	12.2078		14.871	11.2212	11.0243	16.0017	12.6322	8.48145
2.14944	1.58621	1.69553	2.22256	3.89829	4.49026	1.4191	6.93358	5.87142	4.38576		1.35415	4.00779	1.02109	6.77303	4.8876	4.95044	6.51195	4.69043	5.18952	9.51153		0.856296	2.1604	2.44279	3.79648	4.40442	4.56955	5.18582	5.88954	6.33706	6.43994		9.17377	5.85496	8.81306	9.73788	10.4387	6.28728	4.44761	6.87486	11.6038	5.44201		10.8598	6.77038	8.02905	5.21019	7.58228	10.438
[truncated: 38 more columns]
