# Supplementary material for: Ventral striatum dopamine release encodes unique properties of visual stimuli in mice
Source: eLife. 2023 Apr 17;12:e85064. doi: 10.7554/eLife.85064 (PMC10162799; doi:10.7554/eLife.85064)
Supplement: Figure 2—source data 1. [file elife-85064-fig2-data1.xlsx]

## Sheet: 2A-C Full Screen Fades
Instantaneous Transition						dLight1 Peak by Fade-In Time (s)										dLight1 Peak Latency (s) by Fade-In Time (s)										Instantaneous Transition - Pre- vs Post-Stimulus				Peak vs Transition Time				Peak Latency vs Transition Time
Pre-Stimulus Peak	Peak	Peak Latency	FWHM		0	0.05	0.1	0.2	0.3	0.4	0.5	1	2		0	0.05	0.1	0.2	0.3	0.4	0.5	1	2			Paired t test				One phase decay				One-phase association
0.787635	13.7693	0.43118	0.127809		13.7693	10.2723	7.67404	2.60415	6.78859	4.45117	4.5414	2.97501	1.33204		0.43118	0.441011	0.441011	0.460674	0.480337	0.519663	0.549157	0.539326	0.578652			P value	<0.0001			Best-fit values				Best-fit values
0.963382	10.2558	0.441011	0.226124		10.2558	6.76703	7.10432	5.65119	5.57167	4.86236	3.43263	1.93644	0.804009		0.441011	0.450843	0.460674	0.470506	0.509831	0.529494	0.519663	0.56882	0.853933			P value summary	****			Y0	8.835			Y0	0.4279
0.246889	5.26424	0.441011	0.176966		5.26424	5.43026	3.7506	2.70744	3.20243	3.4226	4.76301	2.2094	0.92576		0.441011	0.441011	0.460674	0.470506	0.549157	0.509831	0.509831	0.588483	0.608146			Significantly different (P < 0.05)?	Yes			Plateau	1.362			Plateau	0.5857
0.21816	11.4363	0.450843	0.13764		11.4363	7.18827	10.0508	6.59011	5.70422	5.1726	6.75501	3.87182	2.12798		0.450843	0.470506	0.480337	0.470506	0.519663	0.529494	0.539326	0.549157	0.56882			One- or two-tailed P value?	Two-tailed			K	2.338			K	1.859
0.589284	6.59925	0.441011	0.127809		6.59925	6.37199	3.7732	2.73442	3.77315	3.10808	3.47862	1.28394	1.37854		0.441011	0.441011	0.441011	0.519663	0.460674	0.519663	0.558989	0.736753	1.86657			t, df	t=7.012, df=10			Half Life	0.2965			Tau	0.5378
1.42166	8.06913	0.421348	0.127809		8.06913	7.47875	5.5742	4.02701	3.29687	2.46098	3.98501	0.788631	1.21723		0.421348	0.441011	0.450843	0.470506	0.509831	0.529494	0.539326	0.647472	0.952247			Number of pairs	11			Tau	0.4278			Half-time	0.3728
0.981702	8.92827	0.43118	0.13764		8.92827	5.67209	4.4002	4.08008	3.54438	4.56859	3.42592	1.06499	0.908498		0.43118	0.441011	0.441011	0.519663	0.480337	0.470506	0.539326	0.588483	1.46348							Span	7.473			Span	0.1577
0.433346	20.298	0.421348	0.127809		20.298	10.6422	12.9222	11.1483	8.73814	4.44436	10.9851	9.97513	1.78457		0.421348	0.43118	0.450843	0.460674	0.480337	0.480337	0.529494	0.519663	1.34551			How big is the difference?				95% CI (profile likelihood)				95% CI (profile likelihood)
0.267533	4.04661	0.450843	0.117978		4.04661	5.4454	4.13747	2.04867	2.69892	2.15108	1.49365	0.771292	1.76525		0.450843	0.450843	0.470506	0.470506	0.509831	0.558989	0.56882	0.598315	0.598315			Mean of differences (B - A)	9.725			Y0	7.028 to 11.02			Y0	0.4129 to 0.4425
1.11501	13.6816	0.43118	0.147472		13.6816	5.12642	7.22064	7.79671	8.78029	7.07584	6.94512	4.55062	3.87454		0.43118	0.450843	0.450843	0.460674	0.509831	0.490169	0.56882	0.598315	0.627809			SD of differences	4.6			Plateau	-4.481 to 3.693			Plateau	0.5644 to 0.6134
0.237401	11.8883	0.421348	0.117978		11.8883	10.8154	8.8996	9.74135	5.18014	7.47918	7.30667	3.98633	0.666028		0.421348	0.421348	0.43118	0.450843	0.480337	0.480337	0.549157	0.539326	0.726124			SEM of differences	1.387			K	0.5161 to 8.655			K	1.217 to 2.668
																										95% confidence interval	6.635 to 12.82			Half Life	0.08008 to 1.343			Tau	0.3748 to 0.8219
																										R squared (partial eta squared)	0.831			Tau	0.1155 to 1.938			Half-time	0.2598 to 0.5697
																														Goodness of Fit				Goodness of Fit
																										How effective was the pairing?				Degrees of Freedom	6			Degrees of Freedom	6
																										Correlation coefficient (r)	0.0614			R squared	0.8991			R squared	0.9798
																										P value (one tailed)	0.4288			Sum of Squares	5.97			Sum of Squares	0.0004573
																										P value summary	ns			Sy.x	0.9975			Sy.x	0.00873
																										Was the pairing significantly effective?	No			Constraints				Constraints
																														K	K > 0			K	K > 0
																														Number of points				Number of points
																														# of X values	9			# of X values	9
																														# Y values analyzed	9			# Y values analyzed	9

## Sheet: 2D-F White LED Stimuli
Peak dLight 1Response									Response Latency										Peak Response									Peak Latency									Peak Response			Peak Latency
	White LED Intensity (uW/cm2)								White LED Intensity (uW/cm2)										Repeated measures ANOVA summary									Repeated measures ANOVA summary									One-phase association			One phase decay
0 (TTL only)	0.0002	0.0005	0.001	0.002	0.01	1	5		0.0002	0.0005	0.001	0.002	0.01	1	5				Assume sphericity?	No								Assume sphericity?	No								Best-fit values			Best-fit values
0.639024	1.44598	2.78541	2.80328	4.319	6.69388	5.60747	5.39839		0.401685	0.411517	0.411517	0.391854	0.372191	0.342697	0.342697				F	38.79								F	47.35								Y0	1.198		Y0	0.4239
0.432939	5.9341	9.03495	9.4984	7.61242	9.27251	11.5535	13.1074		0.43118	0.43118	0.411517	0.421348	0.391854	0.36236	0.36236				P value	<0.0001								P value	<0.0001								Plateau	8.415		Plateau	0.3518
0.260473	3.52555	3.9525	5.09289	6.10847	8.26041	8.10864	7.8536		0.421348	0.411517	0.391854	0.401685	0.372191	0.352528	0.342697				P value summary	****								P value summary	****								K	1355		K	127.3
0.617899	3.51792	4.8121	6.86874	7.80548	10.7898	7.631	9.71396		0.421348	0.411517	0.411517	0.391854	0.372191	0.352528	0.352528				Statistically significant (P < 0.05)?	Yes								Statistically significant (P < 0.05)?	Yes								Tau	0.0007381		Half Life	0.005446
0.356218	2.92665	2.4992	5.18152	7.78576	9.54702	5.94641	7.95509		0.470506	0.480337	0.460674	0.421348	0.382022	0.352528	0.352528				Geisser-Greenhouse's epsilon	0.3672								Geisser-Greenhouse's epsilon	0.2796								Half-time	0.0005116		Tau	0.007856
0.765511	7.88967	6.2284	9.07603	11.3774	11.9065	9.60301	9.75061		0.411517	0.401685	0.401685	0.391854	0.372191	0.352528	0.342697				R squared	0.8661								R squared	0.8875								Span	7.217		Span	0.07209
0.395282	2.64204	4.42053	4.07855	7.33579	7.40738	6.64193	7.34975		0.43118	0.411517	0.391854	0.382022	0.372191	0.352528	0.352528																						95% CI (profile likelihood)			95% CI (profile likelihood)
																			Was the matching effective?									Was the matching effective?									Y0	-0.3199 to 2.606		Y0	0.4152 to 0.4342
																			F	15.85								F	7.97								Plateau	7.531 to 9.330		Plateau	0.3424 to 0.3614
																			P value	<0.0001								P value	<0.0001								K	711.9 to 2658		K	67.75 to 282.6
																			P value summary	****								P value summary	****								Tau	0.0003762 to 0.001405		Half Life	0.002453 to 0.01023
																			Is there significant matching (P < 0.05)?	Yes								Is there significant matching (P < 0.05)?	Yes								Half-time	0.0002608 to 0.0009736		Tau	0.003538 to 0.01476
																			R squared	0.2327								R squared	0.13								Goodness of Fit			Goodness of Fit
																																					Degrees of Freedom	53		Degrees of Freedom	46
																			ANOVA table	SS	DF	MS	F (DFn, DFd)	P value				ANOVA table	SS	DF	MS	F (DFn, DFd)	P value				R squared	0.6308		R squared	0.7562
																			Treatment (between columns)	410.5	7	58.64	F (2.570, 15.42) = 38.79	P<0.0001				Treatment (between columns)	0.04343	6	0.007239	F (1.678, 10.07) = 47.35	P<0.0001				Sum of Squares	228.1		Sum of Squares	0.01371
																			Individual (between rows)	143.7	6	23.95	F (6, 42) = 15.85	P<0.0001				Individual (between rows)	0.00731	6	0.001218	F (6, 36) = 7.970	P<0.0001				Sy.x	2.074		Sy.x	0.01726
																			Residual (random)	63.49	42	1.512						Residual (random)	0.005504	36	0.0001529						Constraints			Constraints
																			Total	617.7	55							Total	0.05625	48							K	K > 0		K	K > 0
																			Data summary									Data summary									Number of points			Number of points
																			Number of treatments (columns)	8								Number of treatments (columns)	7								# of X values	64		# of X values	56
																			Number of subjects (rows)	7								Number of subjects (rows)	7								# Y values analyzed	56		# Y values analyzed	49
																			Number of missing values	0								Number of missing values	0
																			Bonferroni's multiple comparisons test	Mean Diff.	95.00% CI of diff.	Below threshold?	Summary	Adjusted P Value	A-?			Bonferroni's multiple comparisons test	Mean Diff.	95.00% CI of diff.	Below threshold?	Summary	Adjusted P Value	A-?
																			0 vs. 0.0002	-3.488	-6.707 to -0.2688	Yes	*	0.0345	B	0.0002		0.0002 vs. 0.0005	0.004213	-0.01206 to 0.02049	No	ns	>0.9999	B	0.0005
																			0 vs. 0.0005	-4.324	-7.679 to -0.9680	Yes	*	0.0148	C	0.0005		0.0002 vs. 0.001	0.01545	-0.007781 to 0.03868	No	ns	0.2543	C	0.001
																			0 vs. 0.001	-5.59	-9.314 to -1.867	Yes	**	0.0067	D	0.001		0.0002 vs. 0.002	0.02669	0.002220 to 0.05115	Yes	*	0.0336	D	0.002
																			0 vs. 0.002	-6.982	-10.11 to -3.859	Yes	***	0.0008	E	0.002		0.0002 vs. 0.01	0.05056	0.02254 to 0.07858	Yes	**	0.0026	E	0.01
																			0 vs. 0.01	-8.63	-11.30 to -5.964	Yes	****	<0.0001	F	0.01		0.0002 vs. 1	0.07444	0.04472 to 0.1042	Yes	***	0.0004	F	1
																			0 vs. 1	-7.375	-10.57 to -4.184	Yes	***	0.0006	G	1		0.0002 vs. 5	0.07725	0.04923 to 0.1053	Yes	***	0.0002	G	5
																			0 vs. 5	-8.237	-11.91 to -4.560	Yes	***	0.0008	H	0

## Sheet: 2G Light vs Dark Phase
Dark Phase Peak	Light Phase Peak		Paired t test
15.168	17.0561		P value	0.2343
7.81536	4.81441		P value summary	ns
14.3736	13.2146		Significantly different (P < 0.05)?	No
16.1953	16.2521		One- or two-tailed P value?	Two-tailed
14.7355	12.6832		t, df	t=1.266, df=10
16.9631	17.8457		Number of pairs	11
12.6279	9.22306
24.888	17.2667		How big is the difference?
13.8278	6.81867		Mean of differences (B - A)	1.44
11.2079	11.5719		SD of differences	3.772
8.19018	13.4114		SEM of differences	1.137
			95% confidence interval	-1.095 to 3.974
			R squared (partial eta squared)	0.1381
			How effective was the pairing?
			Correlation coefficient (r)	0.6502
			P value (one tailed)	0.0152
			P value summary	*
			Was the pairing significantly effective?	Yes
