# Supplementary material for: Ventral striatum dopamine release encodes unique properties of visual stimuli in mice
Source: eLife. 2023 Apr 17;12:e85064. doi: 10.7554/eLife.85064 (PMC10162799; doi:10.7554/eLife.85064)
Supplement: Figure 3—source data 1. [file elife-85064-fig3-data1.xlsx]

## Sheet: 3A-B Repeated 1s White LED
dLight Peaks																																									Two-way RM ANOVA	Matching: Both factors						Semilog line -- X is log, Y is linear - % of Stimulus 1
Stimulus Number	10 ms ISI										100 ms ISI										1 s ISI										10 s ISI										Assume sphericity?	No						Best-fit values
1	5.10428	8.15588	14.7058	18.3659	11.5662	12.1284	8.96583	18.0456	11.2515		6.24478	5.77529	11.8345	12.3474	13.2954	21.989	5.09939	11.4595	12.0355		5.92794	12.8529	11.8474	11.0292	9.17459	13.013	8.33865	12.8126	11.9723		4.55903	7.58491	8.73179	12.4338	12.1643	12.6198	10.2667	9.51677	11.0663		Alpha	0.05						Yintercept	48.92
2	1.20496	0.707877	0.34896	0.305143	0.608484	1.40094	1.42867	1.55083	0.63861		1.32	1.59513	3.24985	1.426	1.55284	3.80155	2.04287	1.82931	5.21083		5.35656	7.94619	9.03071	7.62531	4.50509	7.68048	6.23614	8.91671	9.23829		2.98752	6.21645	9.60793	11.9016	9.60098	10.767	8.77621	10.2391	10.142									Slope	22.58
3	1.50225	1.43806	0.913574	0.771671	0.814947	0.282258	0.755993	1.31103	1.21759		2.1425	1.36204	3.03219	2.19186	2.22921	5.40502	1.72133	4.98155	3.3459		4.59608	6.74624	9.40614	9.45368	4.01468	8.92555	4.1472	7.95614	9.00266		4.33391	5.67572	9.44757	10.0528	9.48174	10.4972	7.7932	10.1756	9.77006		Source of Variation	% of total variation	P value	P value summary	Significant?	Geisser-Greenhouse's epsilon		95% CI (profile likelihood)
4	1.05651	0.215101	0.032294	1.27836	0.189264	0.668606	0.875398	2.20706	0.918124		1.62126	2.04046	2.73717	0.928062	1.13977	6.1198	1.28939	3.66904	4.17337		2.57343	7.24522	8.21235	7.45961	5.57742	8.58488	5.05427	8.36382	9.8391		4.81399	6.89051	8.39378	8.35198	9.17379	10.0598	8.05652	11.4777	9.03756		Stimulus Number	17.49	<0.0001	****	Yes	0.1052		Yintercept	44.99 to 52.86
5	0.984462	0.886096	0.7083	1.28136	0.632746	0.635519	1.16295	2.4354	0.750257		1.52255	1.15273	4.37499	1.72828	1.85594	4.58517	1.14403	3.69102	3.42022		2.81522	6.17417	8.14225	7.94833	5.94223	7.22217	4.71624	6.01349	8.23006		4.08286	4.89916	8.11062	9.48406	9.83214	8.96682	8.54625	11.6606	9.9953		Interstimulus Interval	53.52	<0.0001	****	Yes	0.9795		Slope	19.36 to 25.79
6	1.03432	0.724611	0.0173363	0.507731	0.444453	0.552933	0.453844	2.5248	1.12785		0.897849	1.39981	2.06463	0.673625	2.54487	7.85979	1.41518	3.34758	1.96609		3.53826	8.18451	7.87443	9.60901	5.75902	7.2934	5.13686	7.6742	8.46793		5.211	5.24587	10.1778	9.67385	8.79423	10.4041	6.81187	9.29965	8.32146		Stimulus Number x Interstimulus Interval	5.388	<0.0001	****	Yes	0.09152		Goodness of Fit
7	1.2602	0.571978	1.47862	1.10965	0.630503	1.09025	1.99121	0.61867	0.603952		1.18227	1.79736	3.72198	1.58104	2.18177	5.52385	0.845324	3.82673	4.81324		3.17463	7.7864	10.2292	7.81044	5.93203	8.34459	3.65702	7.71372	8.40083		4.06748	7.33703	8.03332	10.6288	7.91575	10.1479	7.27113	9.78674	8.13762		Subject x Stimulus Number	1.917						Degrees of Freedom	34
8	1.08265	0.570313	0.239858	1.33632	0.747559	0.600677	0.850119	1.6528	0.696498		1.03358	1.07481	3.67745	1.33727	1.71534	6.3326	1.6894	3.74145	1.61147		3.18332	7.05148	8.56717	7.75113	6.58404	7.94389	2.51496	8.2183	8.3656		5.64592	5.51488	6.78782	9.53554	7.74751	9.12926	7.18422	8.63827	8.30238		Subject x Interstimulus Interval	6.699						R squared	0.8569
9	0.585984	1.58256	0.402932	0.636767	0.722975	0.616361	0.0224339	0.788686	0.97964		0.618667	2.11452	3.31477	2.67375	2.06489	6.48883	1.34217	3.20306	1.93225		2.83512	6.29818	4.51638	6.88004	5.97851	7.15813	3.14981	9.40125	8.44614		3.76001	4.92394	8.82114	9.84156	9.58779	10.4274	8.27206	8.66301	9.47193		Subject	10.47						Sum of Squares	3830
10	0.829763	0.589474	0.658225	1.35857	0.961405	0.480999	0.706916	0.91928	0.542131		1.44962	1.23155	2.13327	1.27365	1.3959	5.97587	1.44957	4.15526	2.3887		3.83309	6.00404	7.84736	5.75141	6.42864	6.89887	4.01165	6.53262	8.53746		4.64856	5.96666	7.88469	9.94095	8.86495	10.3806	8.87905	10.8515	9.33001									Sy.x	10.61
11	1.17629	1.16824	1.79629	0.817215	0.752978	0.0408601	0.940536	1.36227	0.943742		1.36877	1.08945	3.13201	2.02687	1.78603	5.04466	1.41808	4.02675	2.70025		2.2183	5.58529	8.3688	7.92221	4.11099	7.05357	2.15144	6.26701	8.73217		4.12925	4.38436	7.37774	10.8755	8.40892	8.95018	7.65255	8.37903	8.52904		ANOVA table	SS	DF	MS	F (DFn, DFd)	P value
12	0.528093	1.46733	1.67294	1.28541	0.701766	0.954988	0.0511452	0.269281	0.800944		1.18366	0.996005	2.57994	1.93815	1.20897	6.667	0.485696	3.62633	1.95018		3.13051	6.07491	7.92322	5.05691	5.10523	6.13872	3.04952	7.60832	8.23714		4.02057	5.87545	7.1622	8.64274	7.93697	10.1244	6.41285	8.46903	9.56897		Stimulus Number	1588	19	83.6	F (1.998, 15.98) = 72.98	P<0.0001		Number of points
13	1.0757	0.938382	0.64733	0.553471	0.516721	1.259	1.19315	0.294413	2.42979		1.4324	0.734724	2.98404	1.24797	1.67283	5.46339	1.25237	4.03901	1.7158		2.85706	4.78899	8.61693	6.77027	5.06332	7.45861	2.83034	7.60897	8.48907		3.43433	5.22794	6.12734	8.368	8.32163	7.82697	8.08521	8.92309	7.44713		Interstimulus Interval	4862	3	1621	F (2.938, 23.51) = 63.91	P<0.0001		# of X values	40
14	0.6469	0.617826	0.521457	0.547146	0.517388	0.575127	1.06332	1.36885	1.48295		0.941868	1.78366	2.37361	1.65359	2.47203	5.44547	1.98633	3.2024	3.88652		2.75588	5.98755	6.88293	8.05513	4.93557	5.90926	3.04093	7.48046	7.4		3.22462	5.07317	7.57676	8.66548	8.40728	8.70223	6.3715	7.70981	7.2813		Stimulus Number x Interstimulus Interval	489.5	57	8.588	F (5.216, 41.73) = 9.544	P<0.0001		# Y values analyzed	36
15	0.98347	0.527005	2.45967	0.116664	0.897449	1.06096	0.439725	1.8831	0.756581		0.622506	1.58407	1.83275	1.1913	2.37369	4.38648	0.744993	3.42859	3.22013		2.80342	6.30516	7.26198	7.82813	4.93508	7.70001	3.19086	7.78369	9.02779		3.71057	4.99844	7.20044	8.64961	7.6035	8.21777	6.48824	9.89312	8.30627		Subject x Stimulus Number	174.1	152	1.145
16	1.53023	0.426057	0.41351	1.44055	0.922947	0.759416	0.572896	0.60009	2.03681		1.02409	1.53931	2.24635	1.61493	1.52442	5.33923	0.84005	2.77412	2.01063		4.3039	5.03812	8.21723	7.54763	4.77831	7.87009	3.2227	7.63933	6.84144		3.86371	4.38854	6.01207	6.80433	7.98141	7.36442	5.81136	9.02197	8.38188		Subject x Interstimulus Interval	608.6	24	25.36
17	0.872382	0.518787	0.979499	0.755877	0.47882	0.154566	-0.164028	0.430594	0.969922		0.843577	0.84036	2.65802	1.90711	0.940628	4.12366	1.36392	2.62999	2.04876		3.35396	5.49344	6.76365	7.13288	4.40723	7.64627	2.44858	6.79345	7.47255		3.11875	5.06277	7.49717	8.11755	8.04028	9.23736	7.73081	8.17624	7.74818		Subject	951.2	8	118.9
18	0.466091	0.682374	1.56436	1.18356	0.898886	0.537851	0.412566	0.853791	1.22992		0.693014	0.681216	1.77728	1.52589	1.40435	7.51067	1.29618	1.72992	3.60181		3.29477	5.20866	5.85954	6.2068	3.73355	5.62401	1.92949	7.50317	7.05831		4.6229	4.59106	6.79283	9.12755	8.70199	8.30397	6.28097	8.77853	7.21941		Residual	410.3	456	0.8997
19	0.483349	1.36391	0.187497	1.20424	0.997811	0.377646	0.636938	0.876519	1.00433		0.483824	1.38286	2.40211	2.46096	1.01553	4.25932	1.04193	4.31841	2.0903		2.8521	4.97324	7.25572	5.51951	4.98207	6.53993	3.57018	7.52702	8.76332		3.88969	4.38339	7.37218	9.00195	7.59967	8.10185	5.83204	7.6826	8.95874
20	0.492307	0.27359	0.766916	0.253899	0.478269	0.366136	-0.0604123	2.42885	1.06866		0.659506	1.45556	3.11341	1.81725	2.11262	5.41727	1.26255	2.95592	2.43949		3.84896	5.8582	7.12485	5.72009	4.30969	7.66555	3.60418	7.90295	7.13345		4.27154	4.13752	6.84103	8.54234	8.00201	7.37912	4.13502	7.45484	9.5892		Data summary
% of Peak 1	9.64497	3.35451	5.21505	1.38245	4.13506	3.01884	-0.673807	13.4595	9.49787		10.5609	25.2033	26.308	14.7178	15.8899	24.6363	24.7589	25.7944	20.2691		64.9292	45.5789	60.1385	51.8633	46.9742	58.907	43.2226	61.6813	59.5829		93.6941	54.5494	78.3462	68.7028	65.7828	58.4726	40.2762	78.3337	86.6523		Number of columns (Interstimulus Interval)	4
																																									Number of rows (Stimulus Number)	20
																																									Number of subjects (Subject)	9
																																									Number of missing values	0
																																									Bonferroni's multiple comparisons test	Mean Diff.	95.00% CI of diff.	Below threshold?	Summary	Adjusted P Value
																																									Row 1
																																									10 ms vs. 100 ms	0.9121	-4.931 to 6.755	No	ns	>0.9999
																																									10 ms vs. 1 s	1.258	-2.949 to 5.465	No	ns	>0.9999
																																									10 ms vs. 10 s	2.15	-2.051 to 6.350	No	ns	0.6775
																																									100 ms vs. 1 s	0.3458	-4.852 to 5.544	No	ns	>0.9999
																																									100 ms vs. 10 s	1.237	-3.299 to 5.774	No	ns	>0.9999
																																									1 s vs. 10 s	0.8917	-2.248 to 4.031	No	ns	>0.9999
																																									Row 2
																																									10 ms vs. 100 ms	-1.537	-3.239 to 0.1644	No	ns	0.0825
																																									10 ms vs. 1 s	-6.482	-8.586 to -4.378	Yes	****	<0.0001
																																									10 ms vs. 10 s	-8.005	-11.32 to -4.689	Yes	***	0.0002
																																									100 ms vs. 1 s	-4.945	-6.594 to -3.296	Yes	****	<0.0001
																																									100 ms vs. 10 s	-6.468	-9.409 to -3.526	Yes	***	0.0004
																																									1 s vs. 10 s	-1.523	-4.447 to 1.402	No	ns	0.646
																																									Row 3
																																									10 ms vs. 100 ms	-1.934	-3.787 to -0.08012	Yes	*	0.0402
																																									10 ms vs. 1 s	-6.138	-8.960 to -3.315	Yes	***	0.0004
																																									10 ms vs. 10 s	-7.58	-10.44 to -4.724	Yes	****	<0.0001
																																									100 ms vs. 1 s	-4.204	-6.509 to -1.899	Yes	**	0.0013
																																									100 ms vs. 10 s	-5.646	-7.616 to -3.676	Yes	****	<0.0001
																																									1 s vs. 10 s	-1.442	-3.834 to 0.9493	No	ns	0.415
																																									Row 4
																																									10 ms vs. 100 ms	-1.809	-3.866 to 0.2485	No	ns	0.0937
																																									10 ms vs. 1 s	-6.163	-8.808 to -3.518	Yes	***	0.0002
																																									10 ms vs. 10 s	-7.646	-9.689 to -5.604	Yes	****	<0.0001
																																									100 ms vs. 1 s	-4.355	-6.365 to -2.344	Yes	***	0.0004
																																									100 ms vs. 10 s	-5.837	-7.873 to -3.802	Yes	****	<0.0001
																																									1 s vs. 10 s	-1.483	-3.346 to 0.3801	No	ns	0.146
																																									Row 5
																																									10 ms vs. 100 ms	-1.555	-3.296 to 0.1858	No	ns	0.087
																																									10 ms vs. 1 s	-5.303	-7.581 to -3.025	Yes	***	0.0002
																																									10 ms vs. 10 s	-7.345	-9.984 to -4.705	Yes	****	<0.0001
																																									100 ms vs. 1 s	-3.748	-5.502 to -1.994	Yes	***	0.0004
																																									100 ms vs. 10 s	-5.789	-8.297 to -3.281	Yes	***	0.0003
																																									1 s vs. 10 s	-2.042	-4.499 to 0.4161	No	ns	0.1212
																																									Row 6
																																									10 ms vs. 100 ms	-1.642	-4.252 to 0.9675	No	ns	0.3599
																																									10 ms vs. 1 s	-6.239	-8.565 to -3.913	Yes	****	<0.0001
																																									10 ms vs. 10 s	-7.395	-9.917 to -4.872	Yes	****	<0.0001
																																									100 ms vs. 1 s	-4.596	-7.823 to -1.370	Yes	**	0.0067
																																									100 ms vs. 10 s	-5.752	-8.104 to -3.401	Yes	***	0.0002
																																									1 s vs. 10 s	-1.156	-3.367 to 1.055	No	ns	0.6388
																																									Row 7
																																									10 ms vs. 100 ms	-1.791	-4.009 to 0.4276	No	ns	0.1374
																																									10 ms vs. 1 s	-5.966	-8.908 to -3.024	Yes	***	0.0006
																																									10 ms vs. 10 s	-7.108	-9.579 to -4.637	Yes	****	<0.0001
																																									100 ms vs. 1 s	-4.175	-6.099 to -2.251	Yes	***	0.0004
																																									100 ms vs. 10 s	-5.317	-7.454 to -3.180	Yes	***	0.0001
																																									1 s vs. 10 s	-1.142	-3.258 to 0.9744	No	ns	0.5841
																																									Row 8
																																									10 ms vs. 100 ms	-1.604	-3.797 to 0.5890	No	ns	0.2068
																																									10 ms vs. 1 s	-5.823	-8.557 to -3.088	Yes	***	0.0005
																																									10 ms vs. 10 s	-6.745	-8.300 to -5.191	Yes	****	<0.0001
																																									100 ms vs. 1 s	-4.219	-6.742 to -1.695	Yes	**	0.0024
																																									100 ms vs. 10 s	-5.141	-7.113 to -3.170	Yes	***	0.0001
																																									1 s vs. 10 s	-0.9229	-3.237 to 1.391	No	ns	>0.9999
																																									Row 9
																																									10 ms vs. 100 ms	-1.935	-3.943 to 0.07277	No	ns	0.0602
																																									10 ms vs. 1 s	-5.369	-7.754 to -2.985	Yes	***	0.0003
																																									10 ms vs. 10 s	-7.492	-10.35 to -4.633	Yes	***	0.0001
																																									100 ms vs. 1 s	-3.435	-5.869 to -0.9997	Yes	**	0.0071
																																									100 ms vs. 10 s	-5.557	-7.738 to -3.377	Yes	***	0.0001
																																									1 s vs. 10 s	-2.123	-4.749 to 0.5036	No	ns	0.1367
																																									Row 10
																																									10 ms vs. 100 ms	-1.601	-3.640 to 0.4383	No	ns	0.1548
																																									10 ms vs. 1 s	-5.422	-7.352 to -3.492	Yes	****	<0.0001
																																									10 ms vs. 10 s	-7.744	-10.09 to -5.400	Yes	****	<0.0001
																																									100 ms vs. 1 s	-3.821	-5.909 to -1.733	Yes	**	0.0013
																																									100 ms vs. 10 s	-6.144	-8.175 to -4.112	Yes	****	<0.0001
																																									1 s vs. 10 s	-2.322	-4.594 to -0.05049	Yes	*	0.0447
																																									Row 11
																																									10 ms vs. 100 ms	-1.51	-3.310 to 0.2895	No	ns	0.1159
																																									10 ms vs. 1 s	-4.823	-7.766 to -1.881	Yes	**	0.0027
																																									10 ms vs. 10 s	-6.632	-9.393 to -3.871	Yes	***	0.0002
																																									100 ms vs. 1 s	-3.313	-5.763 to -0.8629	Yes	**	0.0092
																																									100 ms vs. 10 s	-5.122	-7.353 to -2.890	Yes	***	0.0003
																																									1 s vs. 10 s	-1.809	-4.472 to 0.8546	No	ns	0.2747
																																									Row 12
																																									10 ms vs. 100 ms	-1.434	-3.644 to 0.7765	No	ns	0.324
																																									10 ms vs. 1 s	-4.955	-6.995 to -2.915	Yes	***	0.0002
																																									10 ms vs. 10 s	-6.72	-8.983 to -4.457	Yes	****	<0.0001
																																									100 ms vs. 1 s	-3.521	-5.901 to -1.141	Yes	**	0.0053
																																									100 ms vs. 10 s	-5.286	-7.126 to -3.446	Yes	****	<0.0001
																																									1 s vs. 10 s	-1.765	-3.772 to 0.2410	No	ns	0.0934
																																									Row 13
																																									10 ms vs. 100 ms	-1.293	-3.327 to 0.7416	No	ns	0.3481
																																									10 ms vs. 1 s	-5.064	-7.701 to -2.427	Yes	***	0.0009
																																									10 ms vs. 10 s	-6.095	-8.411 to -3.779	Yes	****	<0.0001
																																									100 ms vs. 1 s	-3.771	-5.990 to -1.553	Yes	**	0.0021
																																									100 ms vs. 10 s	-4.802	-7.063 to -2.541	Yes	***	0.0005
																																									1 s vs. 10 s	-1.031	-3.653 to 1.591	No	ns	>0.9999
																																									Row 14
																																									10 ms vs. 100 ms	-1.823	-3.342 to -0.3034	Yes	*	0.0186
																																									10 ms vs. 1 s	-5.012	-7.193 to -2.831	Yes	***	0.0003
																																									10 ms vs. 10 s	-6.186	-8.360 to -4.012	Yes	****	<0.0001
																																									100 ms vs. 1 s	-3.189	-5.389 to -0.9895	Yes	**	0.006
																																									100 ms vs. 10 s	-4.363	-6.095 to -2.630	Yes	***	0.0001
																																									1 s vs. 10 s	-1.174	-3.031 to 0.6835	No	ns	0.3547
																																									Row 15
																																									10 ms vs. 100 ms	-1.14	-2.612 to 0.3319	No	ns	0.1639
																																									10 ms vs. 1 s	-5.301	-7.811 to -2.791	Yes	***	0.0005
																																									10 ms vs. 10 s	-6.216	-8.420 to -4.011	Yes	****	<0.0001
																																									100 ms vs. 1 s	-4.161	-6.037 to -2.285	Yes	***	0.0003
																																									100 ms vs. 10 s	-5.076	-6.737 to -3.415	Yes	****	<0.0001
																																									1 s vs. 10 s	-0.9146	-2.698 to 0.8683	No	ns	0.6729
																																									Row 16
																																									10 ms vs. 100 ms	-1.135	-2.942 to 0.6730	No	ns	0.3631
																																									10 ms vs. 1 s	-5.195	-7.416 to -2.975	Yes	***	0.0002
																																									10 ms vs. 10 s	-5.659	-7.715 to -3.602	Yes	****	<0.0001
																																									100 ms vs. 1 s	-4.061	-5.655 to -2.466	Yes	***	0.0001
																																									100 ms vs. 10 s	-4.524	-6.500 to -2.548	Yes	***	0.0003
																																									1 s vs. 10 s	-0.4634	-2.538 to 1.611	No	ns	>0.9999
																																									Row 17
																																									10 ms vs. 100 ms	-1.373	-2.768 to 0.02167	No	ns	0.0541
																																									10 ms vs. 1 s	-5.168	-7.250 to -3.087	Yes	***	0.0002
																																									10 ms vs. 10 s	-6.637	-9.023 to -4.251	Yes	****	<0.0001
																																									100 ms vs. 1 s	-3.795	-5.375 to -2.215	Yes	***	0.0002
																																									100 ms vs. 10 s	-5.264	-6.902 to -3.625	Yes	****	<0.0001
																																									1 s vs. 10 s	-1.469	-3.636 to 0.6993	No	ns	0.2772
																																									Row 18
																																									10 ms vs. 100 ms	-1.377	-3.944 to 1.190	No	ns	0.5943
																																									10 ms vs. 1 s	-4.288	-6.171 to -2.404	Yes	***	0.0003
																																									10 ms vs. 10 s	-6.288	-8.188 to -4.387	Yes	****	<0.0001
																																									100 ms vs. 1 s	-2.911	-5.638 to -0.1837	Yes	*	0.0356
																																									100 ms vs. 10 s	-4.911	-7.442 to -2.380	Yes	***	0.0009
																																									1 s vs. 10 s	-2	-4.170 to 0.1693	No	ns	0.0748
																																									Row 19
																																									10 ms vs. 100 ms	-1.369	-3.102 to 0.3639	No	ns	0.1507
																																									10 ms vs. 1 s	-4.983	-7.251 to -2.716	Yes	***	0.0004
																																									10 ms vs. 10 s	-6.188	-8.372 to -4.004	Yes	****	<0.0001
																																									100 ms vs. 1 s	-3.614	-5.254 to -1.974	Yes	***	0.0004
																																									100 ms vs. 10 s	-4.819	-6.590 to -3.047	Yes	****	<0.0001
																																									1 s vs. 10 s	-1.204	-2.791 to 0.3826	No	ns	0.1782
																																									Row 20
																																									10 ms vs. 100 ms	-1.685	-3.321 to -0.04954	Yes	*	0.0429
																																									10 ms vs. 1 s	-5.233	-6.790 to -3.677	Yes	****	<0.0001
																																									10 ms vs. 10 s	-6.032	-8.225 to -3.838	Yes	****	<0.0001
																																									100 ms vs. 1 s	-3.548	-4.808 to -2.289	Yes	****	<0.0001
																																									100 ms vs. 10 s	-4.347	-6.495 to -2.198	Yes	***	0.0007
																																									1 s vs. 10 s	-0.7983	-2.876 to 1.279	No	ns	>0.9999
																																									10 ms
																																									Row 1 vs. Row 2	11.12	4.591 to 17.65	Yes	**	0.0016
																																									Row 1 vs. Row 3	11.03	4.495 to 17.57	Yes	**	0.0017
																																									Row 1 vs. Row 4	11.21	5.204 to 17.21	Yes	***	0.0008
																																									Row 1 vs. Row 5	10.98	5.006 to 16.95	Yes	***	0.0009
																																									Row 1 vs. Row 6	11.21	5.037 to 17.39	Yes	***	0.001
																																									Row 1 vs. Row 7	10.99	4.498 to 17.49	Yes	**	0.0016
																																									Row 1 vs. Row 8	11.17	5.043 to 17.29	Yes	***	0.001
																																									Row 1 vs. Row 9	11.33	4.904 to 17.75	Yes	**	0.0012
																																									Row 1 vs. Row 10	11.25	5.100 to 17.40	Yes	***	0.0009
																																									Row 1 vs. Row 11	11.03	4.720 to 17.34	Yes	**	0.0013
																																									Row 1 vs. Row 12	11.17	4.946 to 17.40	Yes	**	0.0011
																																									Row 1 vs. Row 13	11.04	4.262 to 17.82	Yes	**	0.0022
																																									Row 1 vs. Row 14	11.22	4.921 to 17.51	Yes	**	0.0011
																																									Row 1 vs. Row 15	11.02	4.903 to 17.13	Yes	**	0.0011
																																									Row 1 vs. Row 16	11.07	4.591 to 17.54	Yes	**	0.0015
																																									Row 1 vs. Row 17	11.48	5.176 to 17.78	Yes	***	0.001
																																									Row 1 vs. Row 18	11.16	5.146 to 17.18	Yes	***	0.0009
																																									Row 1 vs. Row 19	11.24	4.942 to 17.54	Yes	**	0.0011
																																									Row 1 vs. Row 20	11.36	5.475 to 17.24	Yes	***	0.0006
																																									100 ms
																																									Row 1 vs. Row 2	8.672	1.973 to 15.37	Yes	*	0.0101
																																									Row 1 vs. Row 3	8.185	2.190 to 14.18	Yes	**	0.0072
																																									Row 1 vs. Row 4	8.485	2.555 to 14.41	Yes	**	0.0052
																																									Row 1 vs. Row 5	8.512	2.437 to 14.59	Yes	**	0.006
																																									Row 1 vs. Row 6	8.657	3.570 to 13.74	Yes	**	0.0016
																																									Row 1 vs. Row 7	8.29	2.566 to 14.01	Yes	**	0.0048
																																									Row 1 vs. Row 8	8.652	3.052 to 14.25	Yes	**	0.0031
																																									Row 1 vs. Row 9	8.481	3.061 to 13.90	Yes	**	0.0028
																																									Row 1 vs. Row 10	8.736	2.938 to 14.54	Yes	**	0.0037
																																									Row 1 vs. Row 11	8.61	2.699 to 14.52	Yes	**	0.0046
																																									Row 1 vs. Row 12	8.827	3.606 to 14.05	Yes	**	0.0017
																																									Row 1 vs. Row 13	8.838	3.028 to 14.65	Yes	**	0.0034
																																									Row 1 vs. Row 14	8.482	2.587 to 14.38	Yes	**	0.005
																																									Row 1 vs. Row 15	8.966	2.967 to 14.97	Yes	**	0.0039
																																									Row 1 vs. Row 16	9.019	3.243 to 14.79	Yes	**	0.0029
																																									Row 1 vs. Row 17	9.192	2.995 to 15.39	Yes	**	0.0041
																																									Row 1 vs. Row 18	8.873	3.870 to 13.88	Yes	**	0.0012
																																									Row 1 vs. Row 19	8.958	2.791 to 15.13	Yes	**	0.0047
																																									Row 1 vs. Row 20	8.761	3.105 to 14.42	Yes	**	0.003
																																									1 s
																																									Row 1 vs. Row 2	3.381	1.214 to 5.549	Yes	**	0.0029
																																									Row 1 vs. Row 3	3.636	1.269 to 6.002	Yes	**	0.0032
																																									Row 1 vs. Row 4	3.784	2.403 to 5.166	Yes	****	<0.0001
																																									Row 1 vs. Row 5	4.418	2.202 to 6.634	Yes	***	0.0005
																																									Row 1 vs. Row 6	3.715	1.791 to 5.638	Yes	***	0.0006
																																									Row 1 vs. Row 7	3.769	2.062 to 5.476	Yes	***	0.0002
																																									Row 1 vs. Row 8	4.088	2.280 to 5.896	Yes	***	0.0002
																																									Row 1 vs. Row 9	4.701	2.430 to 6.971	Yes	***	0.0004
																																									Row 1 vs. Row 10	4.569	2.188 to 6.951	Yes	***	0.0007
																																									Row 1 vs. Row 11	4.951	2.659 to 7.243	Yes	***	0.0003
																																									Row 1 vs. Row 12	4.96	2.923 to 6.998	Yes	***	0.0001
																																									Row 1 vs. Row 13	4.721	2.469 to 6.972	Yes	***	0.0004
																																									Row 1 vs. Row 14	4.947	2.904 to 6.990	Yes	***	0.0001
																																									Row 1 vs. Row 15	4.459	2.734 to 6.184	Yes	****	<0.0001
																																									Row 1 vs. Row 16	4.612	2.206 to 7.018	Yes	***	0.0007
																																									Row 1 vs. Row 17	5.051	3.095 to 7.006	Yes	****	<0.0001
																																									Row 1 vs. Row 18	5.617	3.459 to 7.775	Yes	****	<0.0001
																																									Row 1 vs. Row 19	4.998	2.816 to 7.181	Yes	***	0.0002
																																									Row 1 vs. Row 20	4.867	3.058 to 6.676	Yes	****	<0.0001
																																									10 s
																																									Row 1 vs. Row 2	0.9672	-0.6791 to 2.613	No	ns	0.6766
																																									Row 1 vs. Row 3	1.302	-0.6300 to 3.233	No	ns	0.381
																																									Row 1 vs. Row 4	1.41	-1.258 to 4.078	No	ns	>0.9999
																																									Row 1 vs. Row 5	1.485	-1.003 to 3.974	No	ns	0.6359
																																									Row 1 vs. Row 6	1.667	-0.9329 to 4.267	No	ns	0.473
																																									Row 1 vs. Row 7	1.735	-0.4557 to 3.926	No	ns	0.1773
																																									Row 1 vs. Row 8	2.273	-0.03285 to 4.579	No	ns	0.0543
																																									Row 1 vs. Row 9	1.686	0.2945 to 3.078	Yes	*	0.0155
																																									Row 1 vs. Row 10	1.355	-0.6476 to 3.358	No	ns	0.3742
																																									Row 1 vs. Row 11	2.251	0.5542 to 3.947	Yes	**	0.0086
																																									Row 1 vs. Row 12	2.303	0.3698 to 4.237	Yes	*	0.0173
																																									Row 1 vs. Row 13	2.798	0.7970 to 4.799	Yes	**	0.0061
																																									Row 1 vs. Row 14	2.881	1.192 to 4.571	Yes	**	0.0016
																																									Row 1 vs. Row 15	2.653	0.2275 to 5.078	Yes	*	0.0293
																																									Row 1 vs. Row 16	3.257	0.6399 to 5.874	Yes	*	0.0131
																																									Row 1 vs. Row 17	2.69	1.002 to 4.379	Yes	**	0.0025
																																									Row 1 vs. Row 18	2.725	0.5372 to 4.913	Yes	*	0.013
																																									Row 1 vs. Row 19	2.902	0.8010 to 5.004	Yes	**	0.0066
																																									Row 1 vs. Row 20	3.177	0.4657 to 5.888	Yes	*	0.0192

## Sheet: 3C 40 Hz Flicker
Baseline	Onset Peak	Offset Peak				Repeated measures ANOVA summary
0.619712	5.42248	0.915145				Assume sphericity?	No
0.57028	7.75507	0.951666				F	100.4
0.621059	15.8232	4.56972				P value	<0.0001
0.446002	14.9705	2.13744				P value summary	****
0.597395	11.6198	3.431				Statistically significant (P < 0.05)?	Yes
0.891163	13.4219	1.33162				Geisser-Greenhouse's epsilon	0.6102
0.785244	14.6958	1.65348				R squared	0.9177
0.524985	8.47212	0.472178
0.398536	12.224	1.50025				Was the matching effective?
0.576672	10.4096	0.135904				F	1.839
						P value	0.1296
						P value summary	ns
						Is there significant matching (P < 0.05)?	No
						R squared	0.07037
						ANOVA table	SS	DF	MS	F (DFn, DFd)	P value
						Treatment (between columns)	716.8	2	358.4	F (1.220, 10.98) = 100.4	P<0.0001
						Individual (between rows)	59.13	9	6.57	F (9, 18) = 1.839	P=0.1296
						Residual (random)	64.29	18	3.572
						Total	840.2	29
						Data summary
						Number of treatments (columns)	3
						Number of subjects (rows)	10
						Number of missing values	0
						Bonferroni's multiple comparisons test	Mean Diff.	95.00% CI of diff.	Below threshold?	Summary	Adjusted P Value
						Baseline vs. Onset	-10.88	-14.05 to -7.709	Yes	****	<0.0001	A-B
						Baseline vs. Offset	-1.107	-2.375 to 0.1615	No	ns	0.0921	A-C
						Onset vs. Offset	9.772	7.167 to 12.38	Yes	****	<0.0001	B-C

## Sheet: 3D Pre-Post 300 LED Stimuli
	Pre/Post 300 x 1s Light Pulses				Repeated measures ANOVA summary
	Pre	Post	48 hrs Later		Assume sphericity?	No
	8.1867	8.07409	10.7433		F	12.38
	11.907	5.98181	10.4054		P value	0.0023
	13.9678	10.9596	13.3091		P value summary	**
	9.13795	4.91231	8.51172		Statistically significant (P < 0.05)?	Yes
	14.115	9.58296	11.2057		Geisser-Greenhouse's epsilon	0.6902
	7.32423	6.54115	9.53585		R squared	0.579
	12.8546	5.94884	6.80752
	6.63924	5.2856	7.45899		Was the matching effective?
	7.55533	7.31481	10.5053		F	4.343
	12.9978	7.02575	12.4869		P value	0.0039
AVE	10.4686	7.1627	10.097		P value summary	**
% Change from Pre		-31.579	-3.54945		Is there significant matching (P < 0.05)?	Yes
					R squared	0.4776
					ANOVA table	SS	DF	MS	F (DFn, DFd)	P value
					Treatment (between columns)	65.59	2	32.79	F (1.380, 12.42) = 12.38	P=0.0023
					Individual (between rows)	103.6	9	11.51	F (9, 18) = 4.343	P=0.0039
					Residual (random)	47.69	18	2.649
					Total	216.8	29
					Data summary
					Number of treatments (columns)	3
					Number of subjects (rows)	10
					Number of missing values	0
					Bonferroni's multiple comparisons test	Mean Diff.	95.00% CI of diff.	Below threshold?	Summary	Adjusted P Value
					Pre vs. Post	3.306	0.9281 to 5.684	Yes	**	0.0083	A-B
					Pre vs. 48 Hrs	0.3716	-2.174 to 2.917	No	ns	>0.9999	A-C
					Post vs. 48 Hrs	-2.934	-4.176 to -1.692	Yes	***	0.0002	B-C
					Test details	Mean 1	Mean 2	Mean Diff.	SE of diff.	n1	n2	t	DF
					Pre vs. Post	10.47	7.163	3.306	0.8106	10	10	4.078	9
					Pre vs. 48 Hrs	10.47	10.1	0.3716	0.8679	10	10	0.4281	9
					Post vs. 48 Hrs	7.163	10.1	-2.934	0.4234	10	10	6.93	9

## Sheet: 3F Paired White LED Stimuli
1 s Preconditioning Stimulus					Stimulus 1 vs Stimulus 2 - 300 s or 1 s First Stimulus Duration								Offset Peaks - 300 s vs 1 s Stimulus
Stimulus 1 Peak	Stimulus 2 Peak	Stim 1 Offset Peak			Two-way RM ANOVA	Matching: Both factors							Paired t test
13.0621	8.69375	0.0446806			Assume sphericity?	No							P value	0.0006
10.7707	7.06075	0.426403			Alpha	0.05							P value summary	***
9.40704	7.36175	1.13732											Significantly different (P < 0.05)?	Yes
11.7299	8.6409	0.260879			Source of Variation	% of total variation	P value	P value summary	Significant?	Geisser-Greenhouse's epsilon			One- or two-tailed P value?	Two-tailed
16.5161	9.3324	0.861005			Type of Initial Stimulus (1 second vs 5 minutes)	5.737	0.0789	ns	No	1			t, df	t=4.909, df=10
12.7786	9.65188	0.783426			Stimulus Number (first vs second)	43.83	<0.0001	****	Yes	1			Number of pairs	11
12.4547	7.76442	0.571601			Type of Initial Stimulus (1 second vs 5 minutes) x Stimulus Number (first vs second)	0.1317	0.6149	ns	No	1
16.81	14.0526	0.395414			Subject x Type of Initial Stimulus (1 second vs 5 minutes)	14.99							How big is the difference?
17.2313	9.40035	0.566897			Subject x Stimulus Number (first vs second)	7.954							Mean of differences (B - A)	2.916
10.1335	6.61977	-0.0214286			Subject	22.47							SD of differences	1.97
12.8421	5.99775	0.123928											SEM of differences	0.5941
					ANOVA table	SS	DF	MS	F (DFn, DFd)	P value			95% confidence interval	1.593 to 4.240
300 s Preconditioning Stimulus					Type of Initial Stimulus (1 second vs 5 minutes)	32.19	1	32.19	F (1.000, 10.00) = 3.827	P=0.0789			R squared (partial eta squared)	0.7067
Stimulus 1 Peak	Stimulus 2 Peak	Stim 1 Offset Peak			Stimulus Number (first vs second)	245.9	1	245.9	F (1.000, 10.00) = 55.10	P<0.0001
17.8904	12.3001	2.72729			Type of Initial Stimulus (1 second vs 5 minutes) x Stimulus Number (first vs second)	0.739	1	0.739	F (1.000, 10.00) = 0.2696	P=0.6149			How effective was the pairing?
10.4728	6.21819	2.28674			Subject x Type of Initial Stimulus (1 second vs 5 minutes)	84.11	10	8.411					Correlation coefficient (r)	0.1729
18.6105	9.40839	3.0389			Subject x Stimulus Number (first vs second)	44.63	10	4.463					P value (one tailed)	0.3056
19.0648	12.4577	3.69061			Subject	126.1	10	12.61					P value summary	ns
15.9454	7.86738	0.831685			Residual	27.42	10	2.742					Was the pairing significantly effective?	No
10.6646	9.1986	6.68528
13.2565	10.675	2.58237			Difference between row means
14.6412	15.8503	5.13641			Mean of 1 Second	10.83
15.5894	7.08243	6.50075			Mean of 5 Min	12.54
16.3353	9.72703	3.05434			Difference between means	-1.711
12.9335	9.7576	0.696297			SE of difference	0.8744
					95% CI of difference	-3.659 to 0.2377
					Difference between column means
					Mean of Pulse 1	14.05
					Mean of Pulse 2	9.324
					Difference between means	4.728
					SE of difference	0.637
					95% CI of difference	3.309 to 6.148
					Interaction CI
					Mean diff, A1 - B1	4.469
					Mean diff, A2 - B2	4.987
					(A1 -B1) - (A2 - B2)	-0.5184
					95% CI of difference	-2.743 to 1.706
					(B1 - A1) - (B2 - A2)	0.5184
					95% CI of difference	-1.706 to 2.743
					Data summary
					Number of columns (Stimulus Number (first vs second))	2
					Number of rows (Type of Initial Stimulus (1 second vs 5 minutes))	2
					Number of subjects (Subject)	11
					Number of missing values	0
					Bonferroni's multiple comparisons test	Mean Diff.	95.00% CI of diff.	Below threshold?	Summary	Adjusted P Value
					1 Second:Pulse 1 vs. 1 Second:Pulse 2	4.469	2.156 to 6.783	Yes	***	0.0005
					1 Second:Pulse 1 vs. 5 Min:Pulse 1	-1.97	-4.283 to 0.3436	No	ns	0.1147
					1 Second:Pulse 1 vs. 5 Min:Pulse 2	3.018	0.7041 to 5.331	Yes	**	0.0098
					1 Second:Pulse 2 vs. 5 Min:Pulse 1	-6.439	-8.752 to -4.125	Yes	****	<0.0001
					1 Second:Pulse 2 vs. 5 Min:Pulse 2	-1.451	-3.765 to 0.8620	No	ns	0.4011
					5 Min:Pulse 1 vs. 5 Min:Pulse 2	4.987	2.674 to 7.301	Yes	***	0.0002
