# Supplementary material for: Ventral striatum dopamine release encodes unique properties of visual stimuli in mice
Source: eLife. 2023 Apr 17;12:e85064. doi: 10.7554/eLife.85064 (PMC10162799; doi:10.7554/eLife.85064)
Supplement: Figure 4—figure supplement 1—source data 1. [file elife-85064-fig4-figsupp1-data1.xlsx]

## Sheet: Figure 4 Supplement - NIR
NIR - Peak Response			NIR 10 uW/cm2 vs 100 uW/cm2
10	100		Paired t test
0.685932	11.7827		P value	0.0387
0.159767	4.72169		P value summary	*
0.31084	2.19827		Significantly different (P < 0.05)?	Yes
0.456243	1.36098		One- or two-tailed P value?	Two-tailed
0.195503	2.87459		t, df	t=2.540, df=7
0.679631	1.76146		Number of pairs	8
0.330152	0.367568
0.38912	3.32048		How big is the difference?
			Mean of differences (B - A)	3.148
			SD of differences	3.505
			SEM of differences	1.239
			95% confidence interval	0.2170 to 6.078
			R squared (partial eta squared)	0.4796
			How effective was the pairing?
			Correlation coefficient (r)	0.3889
			P value (one tailed)	0.1705
			P value summary	ns
			Was the pairing significantly effective?	No

## Sheet: Figure 4 Supplement - Latencies
Gnat1/2-dKO							Opn4-KO
White LED - Peak Latency			White LED - Peak Latency				White LED - Peak Latency			White LED - Peak Latency
WT	Gnat-1/2-dKO		Unpaired t test				WT	Opn4-KO		Unpaired t test
0.352528	0.411517		P value	0.0014			0.391854	0.342697		P value	0.8736
0.372191	0.490169		P value summary	**			0.352528	0.36236		P value summary	ns
0.352528	0.411517		Significantly different (P < 0.05)?	Yes			0.352528	0.36236		Significantly different (P < 0.05)?	No
0.342697	0.43118		One- or two-tailed P value?	Two-tailed			0.352528	0.352528		One- or two-tailed P value?	Two-tailed
	0.421348		t, df	t=4.767, df=8			0.342697	0.352528		t, df	t=0.1618, df=15
	0.421348						0.352528	0.352528
			How big is the difference?				0.342697			How big is the difference?
			Mean of column A	0.355			0.372191			Mean of column A	0.3552
			Mean of column B	0.4312			0.352528			Mean of column B	0.3542
			Difference between means (B - A) ± SEM	0.07619 ± 0.01598			0.352528			Difference between means (B - A) ± SEM	-0.001043 ± 0.006444
			95% confidence interval	0.03933 to 0.1131			0.342697			95% confidence interval	-0.01478 to 0.01269
			R squared (eta squared)	0.7396						R squared (eta squared)	0.001743
			F test to compare variances							F test to compare variances
			F, DFn, Dfd	5.811, 5, 3						F, DFn, Dfd	3.914, 10, 5
			P value	0.1783						P value	0.1452
			P value summary	ns						P value summary	ns
			Significantly different (P < 0.05)?	No						Significantly different (P < 0.05)?	No
			Data analyzed							Data analyzed
			Sample size, column A	4						Sample size, column A	11
			Sample size, column B	6						Sample size, column B	6
