# Supplementary material for: Ventral striatum dopamine release encodes unique properties of visual stimuli in mice
Source: eLife. 2023 Apr 17;12:e85064. doi: 10.7554/eLife.85064 (PMC10162799; doi:10.7554/eLife.85064)
Supplement: Figure 4—source data 1. [file elife-85064-fig4-data1.xlsx]

## Sheet: 4A-B Individual Wavelengths
UV - Peak Response						Blue - Peak Response						Green - Peak Response						Red - Peak Response									Two-way RM ANOVA	Matching: Both factors
10	1	0.1	0.01	0.001		10	1	0.1	0.01	0.001		10	1	0.1	0.01	0.001		10	1	0.1	0.01	0.001					Assume sphericity?	No
18.496	14.0194	7.45977	3.74177	0.644053		16.1631	12.3636	11.9918	4.58243	7.25603		13.8301	10.4403	12.5321	1.92519	7.09466		12.1799	8.88815	9.12853	1.86972	0.533328					Alpha	0.05
24.5199	9.51387	15.5178	15.5178	9.01858		15.3987	8.39023	13.2837	10.5813	13.4353		19.2185	6.44447	6.19032	10.3287	9.44319		16.7325	6.43601	6.64964	2.65565	0.548003
18.3987	5.46433	4.96103	4.96103	1.67286		15.4337	5.0214	6.67543	14.6366	8.02357		18.8396	4.62748	6.97877	4.78721	9.45099		15.0527	2.77616	2.71221	0.889252	0.470008					Source of Variation	% of total variation	P value	P value summary	Significant?	Geisser-Greenhouse's epsilon
17.393	15.2534	12.1082	12.1082	1.5456		15.5559	14.7447	12.3985	5.98773	13.0639		11.4072	9.25448	12.5291	11.4019	9.4339		11.0562	9.81978	2.79101	0.868638	2.15566					Wavelength	21.52	<0.0001	****	Yes	0.5943
15.9429	15.7775	7.27057	7.27057	2.85003		16.3895	12.7391	12.9696	12.238	12.3086		14.5166	11.941	10.6714	11.2618	16.1152		13.5292	8.84144	4.27152	0.0995249	0.201879					Light Irradiance	27.15	0.0041	**	Yes	0.4103
13.3907	10.3904	13.295	13.295	2.8816		12.9629	12.3902	6.60373	7.85283	14.0088		10.0712	11.0873	5.92759	6.57141	8.46907		7.45049	8.74889	0.38632	1.1195	0.489785					Wavelength x Light Irradiance	13.13	<0.0001	****	Yes	0.3277
12.0928	12.2159	8.10932	6.42295	0.307064		11.3589	9.29063	9.04945	6.06965	9.86436		10.3773	9.4369	8.74243	4.83116	7.59482		7.56333	9.86741	4.20348	0.657381	1.24366					Subject x Wavelength	4.008
7.09167	13.8169	12.3493	10.8773	4.05564		7.01582	13.8617	10.6144	7.40924	16.2712		6.11985	13.7676	12.49	4.31155	15.0352		5.38715	9.76735	3.38783	1.86972	0.786293					Subject x Light Irradiance	18.85
																											Subject	5.804
																											ANOVA table	SS	DF	MS	F (DFn, DFd)	P value
																											Wavelength	869	3	289.7	F (1.783, 12.48) = 37.59	P<0.0001
																											Light Irradiance	1096	4	274.1	F (1.641, 11.49) = 10.08	P=0.0041
																											Wavelength x Light Irradiance	530	12	44.16	F (3.933, 27.53) = 9.634	P<0.0001
																											Subject x Wavelength	161.8	21	7.705
																											Subject x Light Irradiance	761	28	27.18
																											Subject	234.3	7	33.48
																											Residual	385.1	84	4.584
																											Data summary
																											Number of columns (Light Irradiance)	5
																											Number of rows (Wavelength)	4
																											Number of subjects (Subject)	8
																											Number of missing values	0
																											Bonferroni's multiple comparisons test	Mean Diff.	95.00% CI of diff.	Below threshold?	Summary	Adjusted P Value
																											360
																											0.001 uW/cm^2 vs. 0.01 uW/cm^2	-6.402	-10.51 to -2.294	Yes	**	0.0041
																											0.001 uW/cm^2 vs. 0.1 uW/cm^2	-7.262	-10.95 to -3.577	Yes	***	0.001
																											0.001 uW/cm^2 vs. 1 uW/cm^2	-9.185	-16.15 to -2.223	Yes	*	0.011
																											0.001 uW/cm^2 vs. 10 uW/cm^2	-13.04	-19.83 to -6.260	Yes	**	0.0011
																											0.01 uW/cm^2 vs. 0.1 uW/cm^2	-0.8596	-2.795 to 1.076	No	ns	>0.9999
																											0.01 uW/cm^2 vs. 1 uW/cm^2	-2.782	-10.64 to 5.074	No	ns	>0.9999
																											0.01 uW/cm^2 vs. 10 uW/cm^2	-6.641	-15.59 to 2.305	No	ns	0.2019
																											0.1 uW/cm^2 vs. 1 uW/cm^2	-1.923	-8.722 to 4.877	No	ns	>0.9999
																											0.1 uW/cm^2 vs. 10 uW/cm^2	-5.782	-14.51 to 2.944	No	ns	0.3201
																											1 uW/cm^2 vs. 10 uW/cm^2	-3.859	-13.96 to 6.246	No	ns	>0.9999
																											475
																											0.001 uW/cm^2 vs. 0.01 uW/cm^2	3.109	-3.757 to 9.975	No	ns	>0.9999
																											0.001 uW/cm^2 vs. 0.1 uW/cm^2	1.331	-4.013 to 6.674	No	ns	>0.9999
																											0.001 uW/cm^2 vs. 1 uW/cm^2	0.6788	-3.782 to 5.139	No	ns	>0.9999
																											0.001 uW/cm^2 vs. 10 uW/cm^2	-2.006	-9.952 to 5.940	No	ns	>0.9999
																											0.01 uW/cm^2 vs. 0.1 uW/cm^2	-1.779	-8.645 to 5.088	No	ns	>0.9999
																											0.01 uW/cm^2 vs. 1 uW/cm^2	-2.43	-11.11 to 6.253	No	ns	>0.9999
																											0.01 uW/cm^2 vs. 10 uW/cm^2	-5.115	-10.81 to 0.5748	No	ns	0.0848
																											0.1 uW/cm^2 vs. 1 uW/cm^2	-0.6518	-5.254 to 3.951	No	ns	>0.9999
																											0.1 uW/cm^2 vs. 10 uW/cm^2	-3.337	-8.442 to 1.769	No	ns	0.3376
																											1 uW/cm^2 vs. 10 uW/cm^2	-2.685	-9.904 to 4.535	No	ns	>0.9999
																											555
																											0.001 uW/cm^2 vs. 0.01 uW/cm^2	3.402	-2.253 to 9.058	No	ns	0.4582
																											0.001 uW/cm^2 vs. 0.1 uW/cm^2	0.8219	-4.407 to 6.051	No	ns	>0.9999
																											0.001 uW/cm^2 vs. 1 uW/cm^2	0.7047	-3.761 to 5.171	No	ns	>0.9999
																											0.001 uW/cm^2 vs. 10 uW/cm^2	-2.718	-11.50 to 6.067	No	ns	>0.9999
																											0.01 uW/cm^2 vs. 0.1 uW/cm^2	-2.58	-9.505 to 4.344	No	ns	>0.9999
																											0.01 uW/cm^2 vs. 1 uW/cm^2	-2.698	-9.624 to 4.229	No	ns	>0.9999
																											0.01 uW/cm^2 vs. 10 uW/cm^2	-6.12	-13.25 to 1.012	No	ns	0.1058
																											0.1 uW/cm^2 vs. 1 uW/cm^2	-0.1172	-3.960 to 3.725	No	ns	>0.9999
																											0.1 uW/cm^2 vs. 10 uW/cm^2	-3.54	-12.68 to 5.603	No	ns	>0.9999
																											1 uW/cm^2 vs. 10 uW/cm^2	-3.423	-13.56 to 6.717	No	ns	>0.9999
																											635
																											0.001 uW/cm^2 vs. 0.01 uW/cm^2	-0.4501	-2.007 to 1.107	No	ns	>0.9999
																											0.001 uW/cm^2 vs. 0.1 uW/cm^2	-3.388	-7.447 to 0.6712	No	ns	0.1203
																											0.001 uW/cm^2 vs. 1 uW/cm^2	-7.34	-10.55 to -4.133	Yes	***	0.0004
																											0.001 uW/cm^2 vs. 10 uW/cm^2	-10.32	-16.34 to -4.286	Yes	**	0.0023
																											0.01 uW/cm^2 vs. 0.1 uW/cm^2	-2.938	-6.319 to 0.4441	No	ns	0.0999
																											0.01 uW/cm^2 vs. 1 uW/cm^2	-6.889	-10.67 to -3.107	Yes	**	0.0016
																											0.01 uW/cm^2 vs. 10 uW/cm^2	-9.865	-15.53 to -4.198	Yes	**	0.0021
																											0.1 uW/cm^2 vs. 1 uW/cm^2	-3.952	-9.008 to 1.104	No	ns	0.1617
																											0.1 uW/cm^2 vs. 10 uW/cm^2	-6.928	-12.27 to -1.583	Yes	*	0.0122
																											1 uW/cm^2 vs. 10 uW/cm^2	-2.976	-11.43 to 5.476	No	ns	>0.9999
																											0.001 uW/cm^2
																											360 vs. 475	-8.907	-12.52 to -5.291	Yes	***	0.0003
																											360 vs. 555	-7.458	-12.33 to -2.589	Yes	**	0.0051
																											360 vs. 635	2.068	-1.808 to 5.945	No	ns	0.5612
																											475 vs. 555	1.449	-2.505 to 5.403	No	ns	>0.9999
																											475 vs. 635	10.98	6.996 to 14.95	Yes	***	0.0001
																											555 vs. 635	9.526	4.914 to 14.14	Yes	***	0.0008
																											0.01 uW/cm^2
																											360 vs. 475	0.6046	-6.596 to 7.806	No	ns	>0.9999
																											360 vs. 555	2.347	-2.350 to 7.044	No	ns	0.6727
																											360 vs. 635	8.021	2.896 to 13.15	Yes	**	0.0045
																											475 vs. 555	1.742	-3.644 to 7.128	No	ns	>0.9999
																											475 vs. 635	7.416	2.605 to 12.23	Yes	**	0.0049
																											555 vs. 635	5.674	0.6904 to 10.66	Yes	*	0.0261
																											0.1 uW/cm^2
																											360 vs. 475	-0.3144	-5.385 to 4.756	No	ns	>0.9999
																											360 vs. 555	0.6262	-5.894 to 7.147	No	ns	>0.9999
																											360 vs. 635	5.943	-0.2409 to 12.13	No	ns	0.0604
																											475 vs. 555	0.9406	-2.596 to 4.477	No	ns	>0.9999
																											475 vs. 635	6.257	3.300 to 9.214	Yes	***	0.0007
																											555 vs. 635	5.316	1.142 to 9.491	Yes	*	0.0144
																											1 uW/cm^2
																											360 vs. 475	0.9563	-1.158 to 3.070	No	ns	0.8643
																											360 vs. 555	2.432	-0.4243 to 5.287	No	ns	0.1046
																											360 vs. 635	3.913	1.595 to 6.231	Yes	**	0.0028
																											475 vs. 555	1.475	-0.8414 to 3.792	No	ns	0.3226
																											475 vs. 635	2.957	0.7418 to 5.172	Yes	*	0.0111
																											555 vs. 635	1.482	-0.6830 to 3.647	No	ns	0.2501
																											10 uW/cm^2
																											360 vs. 475	2.131	-1.798 to 6.060	No	ns	0.5356
																											360 vs. 555	2.868	-0.08834 to 5.825	No	ns	0.0578
																											360 vs. 635	4.797	2.033 to 7.560	Yes	**	0.0024
																											475 vs. 555	0.7373	-2.967 to 4.442	No	ns	>0.9999
																											475 vs. 635	2.666	-0.2818 to 5.614	No	ns	0.08
																											555 vs. 635	1.929	0.3992 to 3.458	Yes	*	0.0152

## Sheet: 4C-D Gnat-dKO
White LED - Peak Magnitude			White LED - Peak Latency			Spectral Analysis - Peak Magnitude													White LED - Peak Magnitude			White LED - Peak Latency			Spectral Analysis
WT	Gnat-1/2-dKO		WT	Gnat-1/2-dKO		Wavelength	WT					Gnat1/2-dKO							Unpaired t test			Unpaired t test			Two-way RM ANOVA	Matching: Stacked
19.2802	5.03994		0.352528	0.411517		360	14.1368	19.4071	15.4952	10.6874		8.41968	6.57908	14.483	15.9572	19.1166	10.6967		P value	0.0001		P value	0.0014		Assume sphericity?	No
16.8575	1.82205		0.372191	0.490169		475	11.1998	15.2889	10.6055	13.536		3.95217	4.7193	1.97963	1.93103	6.42663	0.910493		P value summary	***		P value summary	**		Alpha	0.05
11.5338	1.77079		0.352528	0.411517		555	15.5772	16.1824	13.3437	12.3886		5.19826	1.36024	2.70482	1.41164	1.60388	1.43781		Significantly different (P < 0.05)?	Yes		Significantly different (P < 0.05)?	Yes
17.1167	7.1885		0.342697	0.43118		635	11.9472	11.6421	9.18987	11.3411		0.110073	0.73996	0.8217	0.201795	0.256475	1.0685		One- or two-tailed P value?	Two-tailed		One- or two-tailed P value?	Two-tailed		Source of Variation	% of total variation	P value	P value summary	Significant?	Geisser-Greenhouse's epsilon
	0.432967			0.421348															t, df	t=7.075, df=8		t, df	t=4.767, df=8		Wavelength x Genotype	8.902	0.0015	**	Yes
	3.68442			0.421348																					Wavelength	22.24	0.0003	***	Yes	0.5398
																			How big is the difference?			How big is the difference?			Genotype	47.75	<0.0001	****	Yes
																			Mean of column A	16.2		Mean of column A	0.355		Subject	4.452	0.2822	ns	No
																			Mean of column B	3.323		Mean of column B	0.4312
																			Difference between means (B - A) ± SEM	-12.87 ± 1.820		Difference between means (B - A) ± SEM	0.07619 ± 0.01598		ANOVA table	SS	DF	MS	F (DFn, DFd)	P value
																			95% confidence interval	-17.07 to -8.678		95% confidence interval	0.03933 to 0.1131		Wavelength x Genotype	131.7	3	43.89	F (3, 24) = 7.024	P=0.0015
																			R squared (eta squared)	0.8622		R squared (eta squared)	0.7396		Wavelength	328.9	3	109.6	F (1.619, 12.96) = 17.54	P=0.0003
																									Genotype	706.4	1	706.4	F (1, 8) = 85.80	P<0.0001
																			F test to compare variances			F test to compare variances			Subject	65.86	8	8.232	F (8, 24) = 1.317	P=0.2822
																			F, DFn, Dfd	1.747, 3, 5		F, DFn, Dfd	5.811, 5, 3		Residual	150	24	6.249
																			P value	0.5459		P value	0.1783
																			P value summary	ns		P value summary	ns		Difference between column means
																			Significantly different (P < 0.05)?	No		Significantly different (P < 0.05)?	No		Mean of WT	13.25
																									Mean of Gnat	4.67
																			Data analyzed			Data analyzed			Difference between means	8.578
																			Sample size, column A	4		Sample size, column A	4		SE of difference	0.926
																			Sample size, column B	6		Sample size, column B	6		95% CI of difference	6.442 to 10.71
																									Data summary
																									Number of columns (Genotype)	2
																									Number of rows (Wavelength)	4
																									Number of subjects (Subject)	10
																									Number of missing values	0
																									Bonferroni's multiple comparisons test	Mean Diff.	95.00% CI of diff.	Below threshold?	Summary	Adjusted P Value
																									WT - Gnat
																									UV	2.39	-6.206 to 10.99	No	ns	>0.9999
																									B	9.338	4.608 to 14.07	Yes	**	0.0015
																									G	12.09	8.172 to 16.00	Yes	***	0.0002
																									R	10.5	7.368 to 13.63	Yes	***	0.001
																									Test details	Mean 1	Mean 2	Mean Diff.	SE of diff.	N1	N2	t	DF
																									WT - Gnat
																									UV	14.93	12.54	2.39	2.659	4	6	0.8987	7.763
																									B	12.66	3.32	9.338	1.374	4	6	6.797	6.374
																									G	14.37	2.286	12.09	1.092	4	6	11.07	5.732
																									R	11.03	0.5331	10.5	0.6461	4	6	16.25	3.402

## Sheet: 4E Opn4-KO
White LED - Peak Magnitude			White LED - Peak Latency			White LED - Peak Magnitude			White LED - Peak Latency
WT	Opn4-KO		WT	Opn4-KO		Unpaired t test			Unpaired t test
4.51813	6.77004		0.391854	0.342697		P value	0.4625		P value	0.8736
9.85578	8.6597		0.352528	0.36236		P value summary	ns		P value summary	ns
11.2787	7.15151		0.352528	0.36236		Significantly different (P < 0.05)?	No		Significantly different (P < 0.05)?	No
14.3068	14.1346		0.352528	0.352528		One- or two-tailed P value?	Two-tailed		One- or two-tailed P value?	Two-tailed
7.95192	3.54503		0.342697	0.352528		t, df	t=0.7541, df=15		t, df	t=0.1618, df=15
6.34632	4.64698		0.352528	0.352528
6.10393			0.342697			How big is the difference?			How big is the difference?
6.12407			0.372191			Mean of column A	8.849		Mean of column A	0.3552
9.85102			0.352528			Mean of column B	7.485		Mean of column B	0.3542
14.7978			0.352528			Difference between means (B - A) ± SEM	-1.365 ± 1.809		Difference between means (B - A) ± SEM	-0.001043 ± 0.006444
6.20622			0.342697			95% confidence interval	-5.221 to 2.492		95% confidence interval	-0.01478 to 0.01269
						R squared (eta squared)	0.03653		R squared (eta squared)	0.001743
						F test to compare variances			F test to compare variances
						F, DFn, Dfd	1.155, 5, 10		F, DFn, Dfd	3.914, 10, 5
						P value	0.7883		P value	0.1452
						P value summary	ns		P value summary	ns
						Significantly different (P < 0.05)?	No		Significantly different (P < 0.05)?	No
						Data analyzed			Data analyzed
						Sample size, column A	11		Sample size, column A	11
						Sample size, column B	6		Sample size, column B	6
